# Supplementary material for: Anomalous redshifted emission in Pt( ii ) vs. Ir( iii ) complexes with identical ligands and the application of these complexes in high-efficiency OLEDs
Source: Royal Society of Chemistry journal article supplement (doi:10.1039/d5qi01849h), 2025-10-15
Supplement: d5qi01849h1.pdf [file d5qi01849h1.pdf]

## Supporting Information

Anomalous redshift emission in Pt(II) vs Ir(III) complexes with identical  
ligands and the application of these complexes in high-efficiency OLED

Wenping Liu<sup>a</sup>, Shipan Xu<sup>a</sup>, Xuyang Du<sup>a</sup>, An Yan<sup>a</sup>, Shengli Li<sup>a</sup>, Xiaolong Yang<sup>a,\*</sup>, Jun  
Xi<sup>b</sup>, Yousong Ding<sup>c</sup>, Guijiang Zhou<sup>a,\*</sup> and Yuanhui Sun<sup>a,\*</sup>

<sup>a</sup> School of Chemistry, Xi'an Key Laboratory of Sustainable Energy Material Chemistry, Engineering Research Center of Energy

Storage Materials and Devices, Ministry of Education, Xi'an Jiaotong University, Xi'an 710049, China

<sup>b</sup> School of Electronic Science and Engineering, Xi'an Jiaotong University, Xi'an 710049, China

<sup>c</sup> Department of Chemistry, Southern University of Science and Technology, Shenzhen, 518055, China

\* Corresponding authors

E-mail addresses: zhougj@xjtu.edu.cn (G. Zhou), sunyuanhui@xjtu.edu.cn (Y. Sun), xiaolongyang@xjtu.edu.cn

(X. Yang)

## General experimental information

Commercially available starting materials were used directly without further purification.  $^1\text{H}$  NMR and  $^{13}\text{C}$  NMR spectra were measured in  $\text{CDCl}_3$  on a Bruker Avance 400 MHz spectrometer. Chemical shifts were referenced to the solvent residual peak at  $\delta$  7.26 ppm for  $^1\text{H}$  and 77.0 ppm for  $^{13}\text{C}$ , respectively. Mass spectra (MS) measurements were performed on WATERS I-Class VION IMS QTof. The thermal stability of these complexes were tested on a NETZSCH STA 409C instrument under  $\text{N}_2$  at a heating rate of  $20\text{ K min}^{-1}$ . UV-vis absorption spectra were measured on a Lambda 950 spectrophotometer in dichloromethane at room temperature. Photoluminescent spectra and lifetimes of these complexes were measured on an Edinburgh Instruments Ltd (FLs920) fluorescence spectrophotometer. The solution PLQYs were determined in degassed  $\text{CH}_2\text{Cl}_2$  solutions at room temperature against *fac*-(*piq*) $_2\text{Ir}(\text{acac})$  standard (PLQY = 0.2). Calibrated with ferrocene/ferrocenium ( $\text{Fc}/\text{Fc}^+$ ) couple, cyclic voltammetry investigations were conducted on a Princeton Applied Research (PARSTAT 2273, Advanced Electrochemical System) equipment in  $\text{CH}_3\text{CN}$  solutions containing *n*- $\text{Bu}_4\text{NPF}_6$  (0.1 M) as the supporting electrolyte under a  $\text{N}_2$  atmosphere. The scan rate was  $100\text{ mV s}^{-1}$ . The HOMO and LUMO energy levels were calculated using the oxidation potential ( $E_{\text{ox}}$ ) and reduction potential ( $E_{\text{red}}$ ) according to the equations  $E_{\text{HOMO}} = -(E_{\text{ox}} + 4.8)\text{ eV}$  and  $E_{\text{LUMO}} = -(E_{\text{red}} + 4.8)\text{ eV}$ .

**X-ray diffraction investigation.** The single crystals of Pt(II) complexes MBTQ-Ir and MBTQ-Pt were prepared by slowly diffusing their  $\text{CH}_2\text{Cl}_2$  solutions into methanol at room temperature. The X-ray diffraction data were collected using a Bruker D8

Venture diffractometer on a rotating anode (Mo-K radiation, 0.71073 Å) at 150 K. The structure was solved and refined by the direct method using SHELXT and refined with Olex2[1-3].

**Theoretical computation.** Theoretical calculations were performed for all these Pt(II) complexes based on density functional theory (DFT) and time dependent-DFT (TD-DFT) calculations.[4, 5] Non-metal atoms of C, H, N, O, and S were calculated based on B3LYP/6-31G(d, p). The Pt and Ir atoms were calculated based on B3LYP/LanL2DZ. The excitation behaviors of the complexes were calculated by TD-DFT method based on optimized geometries at the ground states. All calculations were carried out by using the Gaussian 16 program.[6]

**OLED fabrication and measurements.** All the organic layers were successively deposited by means of vacuum deposition onto the ITO-coated glass substrates, which were previously etched, patterned, and washed with detergent, deionized water, acetone, and ethanol in turn. For the doped layer, the dopant and host materials were co-evaporated and the doping concentrations was controlled by deposition rates. The electroluminescence (EL) spectra and CIE coordinates of the devices were measured by a spectrometer (PR655) and the current-voltage-luminescence characteristics were analyzed using Keithley 2400 source meter with PR655.

**General procedure for synthesizing these Pt(II) and Ir(III) complexes.**

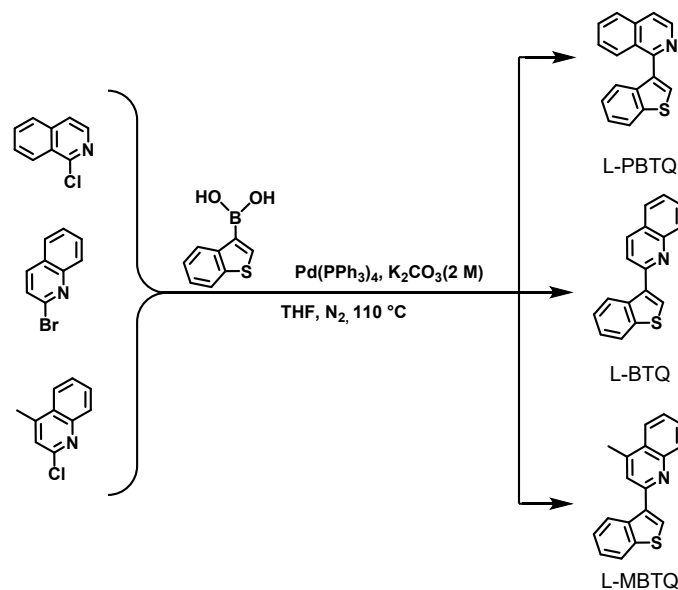

**Scheme S1.** Synthesis route of ligand.

**Ligand L-PBTQ:** Under a  $\text{N}_2$  atmosphere, benzo[b]thiophen-3-ylboronic acid (1200 mg, 7.33 mmol), 2-chloroisoquinoline (1440 mg, 8.07 mmol), and  $\text{Pd(PPh}_3)_4$  (420 mg, 0.36 mmol) were added to a mixture of THF (20 mL) and 2 M  $\text{K}_2\text{CO}_3$  aqueous solution (20 mL). The reaction mixture was stirred at  $110^\circ\text{C}$  under reflux for 12 h. After cooling to room temperature, the mixture was poured into water (50 mL) and extracted with dichloromethane several times. The combined organic layers were dried over anhydrous  $\text{MgSO}_4$  and concentrated under reduced pressure. The crude product was purified by thin-layer chromatography using homemade silica gel to afford the desired product as a solid (1.30 g, 70%).  $^1\text{H}$  NMR (400 MHz,  $\text{CDCl}_3$ )  $\delta$  8.68 (d,  $J = 5.6$  Hz, 1H), 8.04 (d,  $J = 8.5$  Hz, 1H), 7.97 (d,  $J = 8.0$  Hz, 1H), 7.92 (d,  $J = 8.3$  Hz, 1H), 7.74 – 7.68 (m, 4H), 7.54 – 7.49 (m, 1H), 7.43 – 7.32 (m, 2H).

**Ligand L-BTQ:** Under a  $\text{N}_2$  atmosphere, benzo[b]thiophen-3-ylboronic acid (1000 mg, 5.62 mmol), 2-Bromoquinoline (900 mg, 4.33 mmol), and  $\text{Pd(PPh}_3)_4$  (250 mg, 0.21

mmol) were added to a mixture of THF (20 mL) and 2 M K<sub>2</sub>CO<sub>3</sub> aqueous solution (20 mL). The reaction mixture was stirred at 110 °C under reflux for 12 h. After cooling to room temperature, the mixture was poured into water (50 mL) and extracted with dichloromethane several times. The combined organic layers were dried over anhydrous MgSO<sub>4</sub> and concentrated under reduced pressure. The crude product was purified by thin-layer chromatography using homemade silica gel to afford the desired product as a solid (1300 mg, 96%). <sup>1</sup>H NMR (400 MHz, CDCl<sub>3</sub>) δ 8.83 (d, *J* = 8.3 Hz, 1H), 8.23 (d, *J* = 8.5 Hz, 2H), 7.98 – 7.92 (m, 2H), 7.84 (d, *J* = 16.0 Hz, 2H), 7.75 (d, *J* = 7.0 Hz, 1H), 7.59 – 7.48 (m, 2H), 7.44 (t, *J* = 7.5 Hz, 1H).

**Ligand L-BTQ:** Under a N<sub>2</sub> atmosphere, benzo[*b*]thiophen-3-ylboronic acid (1.20 g, 6.75 mmol), 2-chlorolepidine (1000 mg, 5.63 mmol), and Pd(PPh<sub>3</sub>)<sub>4</sub> (320 g, 0.28 mmol) were added to a mixture of THF (20 mL) and 2 M K<sub>2</sub>CO<sub>3</sub> aqueous solution (20 mL). The reaction mixture was stirred at 110 °C under reflux for 12 h. After cooling to room temperature, the mixture was poured into water (50 mL) and extracted with dichloromethane several times. The combined organic layers were dried over anhydrous MgSO<sub>4</sub> and concentrated under reduced pressure. The crude product was purified by thin-layer chromatography using homemade silica gel to afford the desired product as a solid (1420 mg, 92%). <sup>1</sup>H NMR (400 MHz, CDCl<sub>3</sub>) δ 8.79 (d, *J* = 7.9 Hz, 1H), 8.23 (d, *J* = 8.4 Hz, 1H), 8.03 (d, *J* = 8.3 Hz, 1H), 7.94 (d, *J* = 10.3 Hz, 2H), 7.75 (t, *J* = 7.6 Hz, 1H), 7.68 (s, 1H), 7.58 (t, *J* = 8.3 Hz, 1H), 7.52 – 7.46 (m, 1H), 7.42 (t, *J* = 7.5 Hz, 1H), 2.79 (s, 3H).

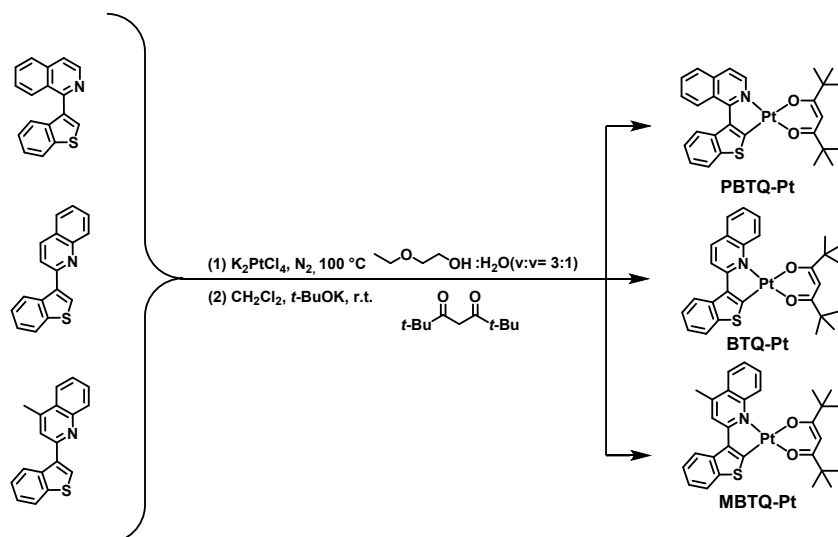

**Scheme S2.** Synthesis route of Pt(II) complexes.

**PBTQ-Pt:** Under a  $\text{N}_2$  atmosphere, the mixture solution of 2-Ethoxyethanol and  $\text{H}_2\text{O}$  (3:1, v/v) (30 mL), ligand L-PBTQ (100 mg, 0.38 mmol), and  $\text{K}_2\text{PtCl}_4$  (16 mg, 0.38 mmol) was heated to  $100\text{ }^\circ\text{C}$  and stirred for ca. 12 h. After being cooled to room temperature, the mixture was extracted with  $\text{CH}_2\text{Cl}_2$  several times. The collected organic layers were dried over anhydrous  $\text{Na}_2\text{SO}_4$ . After the removal of the solvent, the residual dimer was readily dissolved in  $\text{CH}_2\text{Cl}_2$ . After half an hour of activation by adding  $t\text{-BuOK}$  (129 mg, 1.15 mmol) and 2,2,6,6-tetramethyl-3,5-heptanedione (212 mg, 1.15 mmol), dimer dissolved in  $\text{CH}_2\text{Cl}_2$  (20 mL) were added, the mixture was stirred at room temperature for ca. 12 h under a  $\text{N}_2$  atmosphere. The reaction was quenched with water upon completion and extracted three times with dichloromethane. The combined organic phases were dried over anhydrous sodium sulfate and concentrated under reduced pressure. The residual was purified on self-made silica TLC (TLC plates were self-prepared using fine silica gel and an aqueous solution of carboxymethyl cellulose sodium (1.25 g/L)). The developing agent was petroleum

ether/dichloromethane (4:1, v/v). The target band was scraped off and eluted with dichloromethane to give the desired Pt(II) complexes. (Total yield, 59%).  $^1\text{H}$  NMR(400 MHz,  $\text{CDCl}_3$ ): $\delta$  8.73 (dd,  $J = 7.5, 3.9$  Hz, 2H), 8.08 (d,  $J = 8.1$  Hz, 1H), 7.87 – 7.81 (m, 2H), 7.77 – 7.72 (m, 1H), 7.65 – 7.58 (m, 1H), 7.38 (d,  $J = 6.5$  Hz, 1H), 7.31 – 7.27 (m, 1H), 7.19 (t,  $J = 8.1$  Hz, 1H), 5.90 (s, 1H), 1.32 (d,  $J = 3.7$  Hz, 18H);  $^{13}\text{C}$  NMR(101 MHz,  $\text{CDCl}_3$ )  $\delta$  195.12, 194.05, 167.10, 161.10, 142.02, 138.81, 138.26, 137.99, 137.84, 131.72, 128.79, 126.43, 126.03, 123.99, 123.88, 123.08, 121.55, 121.41, 116.66, 93.55, 41.55, 41.51, 28.51, 28.40. ESI-MS ( $m/z$ ) :  $[\text{M} + \text{Na}]^+$ , 661.1458; found, 661.1498.

**BTQ-Pt:** Under a  $\text{N}_2$  atmosphere, the mixture solution of 2-Ethoxyethanol and  $\text{H}_2\text{O}$  (3:1, v/v) (30 mL), ligand L-BTQ (100 mg, 0.38 mmol,) and  $\text{K}_2\text{PtCl}_4$  (100 mg, 0.38 mmol) was heated to 100 °C and stirred for ca. 12 h. After being cooled to room temperature, the mixture was extracted with  $\text{CH}_2\text{Cl}_2$  several times. The collected organic layers were dried over anhydrous  $\text{Na}_2\text{SO}_4$ . After the removal of the solvent, the residual dimer was readily dissolved in  $\text{CH}_2\text{Cl}_2$ . After half an hour of activation by adding *t*-BuOK (129 mg, 1.15 mmol) and 2,2,6,6-tetramethyl-3,5-heptanedione (212 mg, 1.15 mmol), dimer dissolved in  $\text{CH}_2\text{Cl}_2$  (20 mL) were added, the mixture was stirred at room temperature for ca. 12 h under a  $\text{N}_2$  atmosphere. The subsequent processing procedure is the same as described above, obtaining the BTQ-Pt complex. (Total Yield, 25%).  $^1\text{H}$  NMR(400 MHz,  $\text{CDCl}_3$ ): $\delta$  9.66 (d,  $J = 8.9$  Hz, 1H), 8.26 (d,  $J = 8.6$  Hz, 1H), 8.08 (dd,  $J = 21.2, 8.4$  Hz, 2H), 7.87 (d,  $J = 8.6$  Hz, 1H), 7.79 – 7.68 (m, 2H), 7.50 (t,  $J = 7.5$  Hz, 1H), 7.37 (t,  $J = 7.0$  Hz, 1H), 7.23 (t,  $J = 7.0$  Hz, 1H), 5.99 (s,

1H), 1.34 (d,  $J = 6.8$  Hz, 18H).  $^{13}\text{C}$  NMR (101 MHz,  $\text{CDCl}_3$ )  $\delta$  195.33, 193.84, 166.60, 159.70, 150.30, 141.35, 139.73, 138.24, 137.21, 131.12, 127.72, 126.15, 125.45, 125.17, 124.52, 123.17, 121.93, 118.87, 116.85, 92.94, 42.30, 41.45, 28.55. ESI-MS ( $m/z$ ) :  $[\text{M} + \text{Na}]^+$ , 661.1458; found, 661.1516.

**MBTQ-Pt:** Under a  $\text{N}_2$  atmosphere, the mixture solution of 2-Ethoxyethanol and  $\text{H}_2\text{O}$  (3:1, v/v) (30 mL), ligand L-MBTQ (150 mg, 0.55 mmol,) and  $\text{K}_2\text{PtCl}_4$  (228 mg, 0.55 mmol) was heated to 100 °C and stirred for ca. 12 h. After being cooled to room temperature, the mixture was extracted with  $\text{CH}_2\text{Cl}_2$  several times. The collected organic layers were dried over anhydrous  $\text{Na}_2\text{SO}_4$ . After the removal of the solvent, the residual dimer was readily dissolved in  $\text{CH}_2\text{Cl}_2$ . After half an hour of activation by adding *t*-BuOK (185 mg, 1.65 mmol) and 2,2,6,6-tetramethyl-3,5-heptanedione (304 mg, 1.65 mmol), dimer dissolved in  $\text{CH}_2\text{Cl}_2$  (20 mL) were added, the mixture was stirred at room temperature for ca. 12 h under a  $\text{N}_2$  atmosphere. The subsequent processing procedure is the same as described above, obtaining the MBTQ-Pt complex. (Total Yield, 16%).  $^1\text{H}$  NMR(400 MHz,  $\text{CDCl}_3$ ) :  $\delta$  9.63 (d,  $J = 8.9$  Hz, 1H), 8.12 (d,  $J = 8.1$  Hz, 1H), 7.92 – 7.85 (m, 3H), 7.69 (ddd,  $J = 8.7, 6.9, 1.7$  Hz, 1H), 7.51 (t,  $J = 7.6$  Hz, 1H), 7.37 (t,  $J = 7.8$  Hz, 1H), 7.22 (t,  $J = 7.0$  Hz, 1H), 5.97 (s, 1H), 2.85 (s, 3H), 1.34 (d,  $J = 7.9$  Hz, 18H).  $^{13}\text{C}$  NMR (101 MHz,  $\text{CDCl}_3$ )  $\delta$  195.20, 193.74, 165.86, 159.13, 149.69, 148.09, 141.35, 138.33, 137.22, 130.70, 126.04, 125.87, 124.90, 124.38, 123.73, 123.10, 121.80, 118.88, 117.77, 92.86, 42.27, 41.43, 28.54, 19.62. ESI-MS ( $m/z$ ) :  $[\text{M} + \text{Na}]^+$ , 675.1615; found, 675.1621.



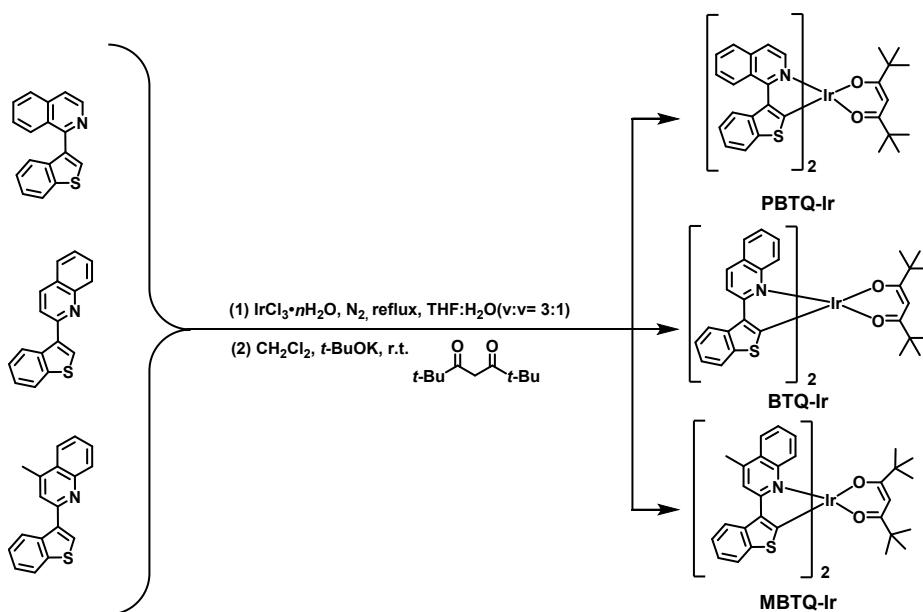

**Scheme S3.** Synthesis route of Ir(III) complexes.

**PBTQ-Ir:** Under a  $\text{N}_2$  atmosphere, the mixture solution of THF and  $\text{H}_2\text{O}$  (3:1, v/v) (30 mL), ligand L-PBTQ (150 mg, 0.58 mmol), and  $\text{IrCl}_3 \cdot n\text{H}_2\text{O}$  (91 mg, 0.29 mmol) were placed in a sealed reaction tube. The sealed tube was heated to  $110^\circ\text{C}$  using magnetic stirrer, maintained at this temperature with stirring for 12 h. After being cooled to room temperature, the mixture was extracted with  $\text{CH}_2\text{Cl}_2$  several times. The collected organic layers were dried over anhydrous  $\text{Na}_2\text{SO}_4$ . After the removal of the solvent, the residual was readily dissolved in  $\text{CH}_2\text{Cl}_2$ . After half an hour of activation by adding  $t\text{-BuOK}$  (96 mg, 0.86 mmol) and 2,2,6,6-tetramethyl-3,5-heptanedione (159 mg, 0.86 mmol), residues dissolved in  $\text{CH}_2\text{Cl}_2$  (20 mL) were added, the mixture was stirred at room temperature for ca. 12 h under a  $\text{N}_2$  atmosphere. The subsequent processing procedure is the same as described above, obtaining the PBTQ-Ir complex. (Total Yield, 40%).  $^1\text{H}$  NMR(400 MHz,  $\text{CDCl}_3$ ): $\delta$  (ppm)  $\delta$  8.83 (d,  $J$  = 8.4 Hz, 2H), 8.13 (dd,  $J$  = 7.3, 5.1 Hz, 4H), 7.90 (d,  $J$  = 8.2 Hz, 2H), 7.73 (t,  $J$  = 6.8 Hz, 2H), 7.65 (t,  $J$  = 6.9 Hz, 2H), 7.54 (d,  $J$  = 7.8 Hz, 2H), 7.37 (d,  $J$  = 6.4 Hz, 2H), 7.24 – 7.19 (m, 2H), 7.01

(t,  $J = 8.1$  Hz, 2H), 5.51 (s, 1H), 0.84 (s, 18H).  $^{13}\text{C}$  NMR (101 MHz,  $\text{CDCl}_3$ ):  $\delta$  194.93, 167.85, 167.28, 143.95, 140.65, 138.52, 138.02, 137.65, 131.23, 128.75, 126.14, 125.35, 124.09, 123.42, 122.22, 121.06, 120.34, 116.23, 90.18, 41.12, 28.02. ESI-MS ( $m/z$ ) :  $[\text{M} + \text{Na}]^+$ , 919.1974; found, 919.2003.

**BTQ-Ir:** Under a  $\text{N}_2$  atmosphere, the mixture solution of THF and  $\text{H}_2\text{O}$  (3:1, v/v) (30 mL), ligand L-BTQ (150 mg, 0.58 mmol), and  $\text{IrCl}_3 \cdot n\text{H}_2\text{O}$  (91 mg, 0.29 mmol) were placed in a sealed reaction tube. The sealed tube was heated to  $110^\circ\text{C}$  using magnetic stirrer, maintained at this temperature with stirring for 12 h. After being cooled to room temperature, the mixture was extracted with  $\text{CH}_2\text{Cl}_2$  several times. The collected organic layers were dried over anhydrous  $\text{Na}_2\text{SO}_4$ . After the removal of the solvent, the residual was readily dissolved in  $\text{CH}_2\text{Cl}_2$ . After half an hour of activation by adding *t*-BuOK (96 mg, 0.86 mmol) and 2,2,6,6-tetramethyl-3,5-heptanedione (159 mg, 0.86 mmol), residues dissolved in  $\text{CH}_2\text{Cl}_2$  (20 mL) were added, the mixture was stirred at room temperature for ca. 12 h under a  $\text{N}_2$  atmosphere. The subsequent processing procedure is the same as described above, obtaining the BTQ-Ir complex. (Total Yield, 14%).  $^1\text{H}$  NMR (400 MHz,  $\text{CDCl}_3$ ):  $\delta$  8.33 (dd,  $J = 8.7, 3.1$  Hz, 4H), 8.23 (dd,  $J = 11.9, 8.2$  Hz, 4H), 7.75 (dd,  $J = 7.9, 1.7$  Hz, 2H), 7.53 (d,  $J = 7.2$  Hz, 2H), 7.44 – 7.40 (m, 2H), 7.37 – 7.32 (m, 4H), 7.09 – 7.05 (m, 2H), 5.09 (s, 1H), 0.67 (s, 18H).  $^{13}\text{C}$  NMR  $\delta$  8.33 (dd,  $J = 8.7, 3.1$  Hz, 4H), 8.23 (dd,  $J = 11.9, 8.2$  Hz, 4H), 7.75 (dd,  $J = 7.9, 1.7$  Hz, 2H), 7.53 (d,  $J = 7.2$  Hz, 2H), 7.44 – 7.40 (m, 2H), 7.37 – 7.32 (m, 4H), 7.09 – 7.05 (m, 2H), 5.09 (s, 1H), 0.67 (s, 18H). ESI-MS ( $m/z$ ) :  $[\text{M} + \text{Na}]^+$ , 919.1974; found, 919.2015.

**MBTQ-Ir:** Under a N<sub>2</sub> atmosphere, the mixture solution of THF and H<sub>2</sub>O (3:1, v/v) (30 mL), ligand L-MBTQ (150 mg, 0.55 mmol), and IrCl<sub>3</sub>·nH<sub>2</sub>O (88 mg, 0.28 mmol) were placed in a sealed reaction tube. The sealed tube was heated to 110°C using magnetic stirrer, maintained at this temperature with stirring for 12 h. After being cooled to room temperature, the mixture was extracted with CH<sub>2</sub>Cl<sub>2</sub> several times. The collected organic layers were dried over anhydrous Na<sub>2</sub>SO<sub>4</sub>. After the removal of the solvent, the residual was readily dissolved in CH<sub>2</sub>Cl<sub>2</sub>. After half an hour of activation by adding *t*-BuOK (93 mg, 0.83 mmol) and 2,2,6,6-tetramethyl-3,5-heptanedione (152 mg, 0.83 mmol), residues dissolved in CH<sub>2</sub>Cl<sub>2</sub> (20 mL) were added, the mixture was stirred at room temperature for ca. 12 h under a N<sub>2</sub> atmosphere. The subsequent processing procedure is the same as described above, obtaining the MBTQ-Ir complex. (Total Yield, 19%). <sup>1</sup>H NMR(400 MHz, CDCl<sub>3</sub>): δ 8.35 (d, *J* = 7.6 Hz, 2H), 8.26 (d, *J* = 8.3 Hz, 2H), 8.20 (s, 2H), 7.90 (d, *J* = 6.6 Hz, 2H), 7.52 (d, *J* = 7.9 Hz, 2H), 7.46 – 7.41 (m, 2H), 7.36 – 7.30 (m, 4H), 7.05 (t, *J* = 7.9 Hz, 2H), 5.08 (s, 1H), 2.98 (s, 6H), 0.66 (s, 18H). <sup>13</sup>C NMR (101 MHz, CDCl<sub>3</sub>) δ 194.79, 166.57, 165.42, 149.67, 146.96, 144.39, 139.17, 138.21, 130.27, 125.87, 125.33, 124.52, 123.94, 123.51, 122.40, 120.64, 118.41, 117.79, 89.97, 40.61, 27.71, 19.48. ESI-MS (*m/z*) : [M + Na]<sup>+</sup>, 947.2287; found, 947.2272.

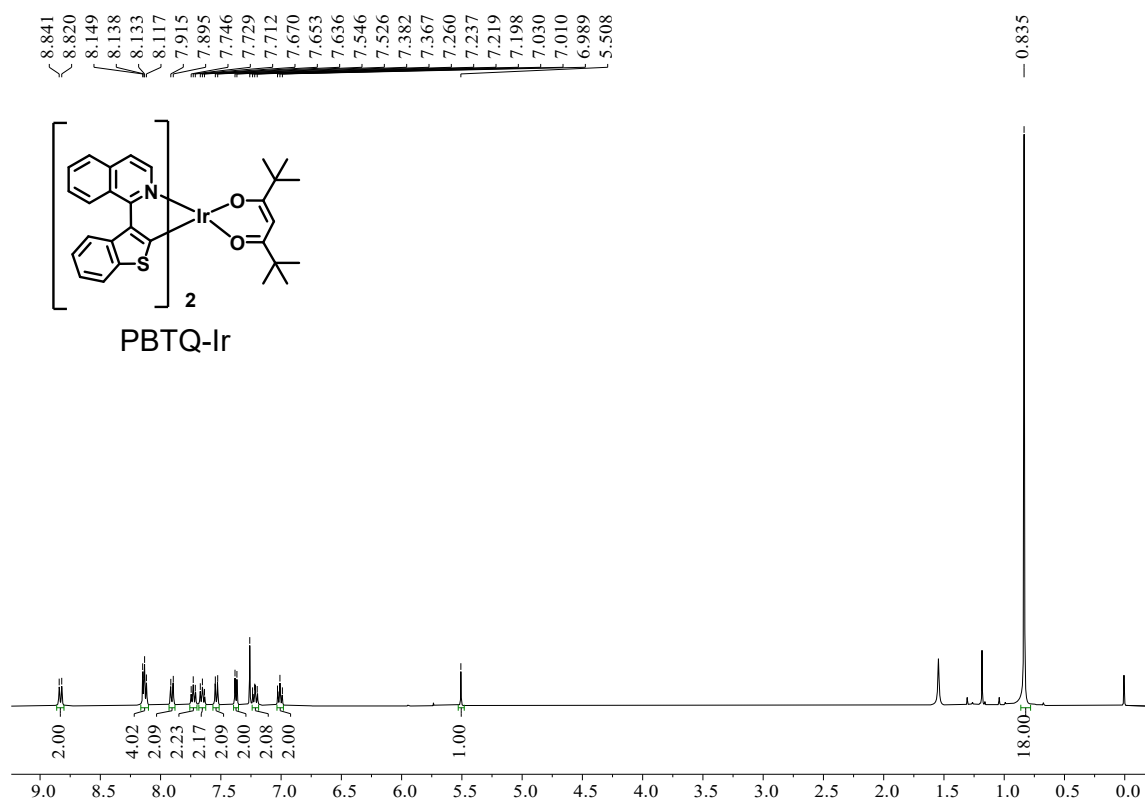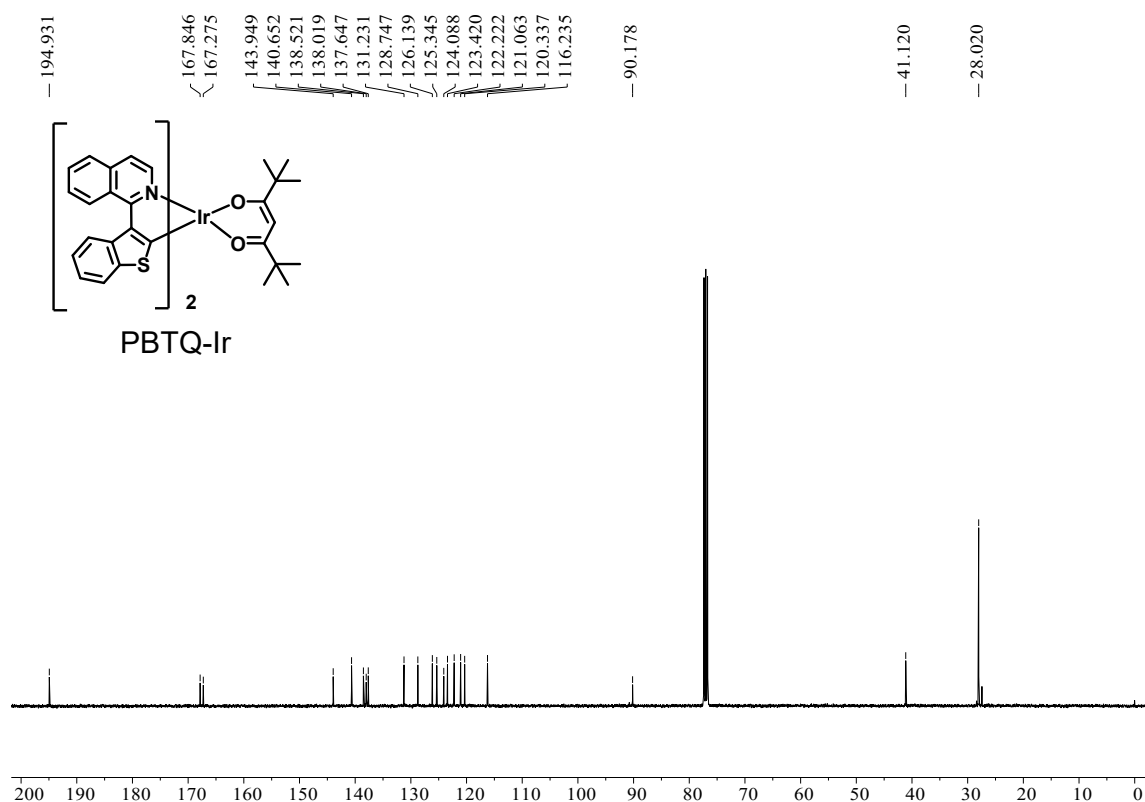

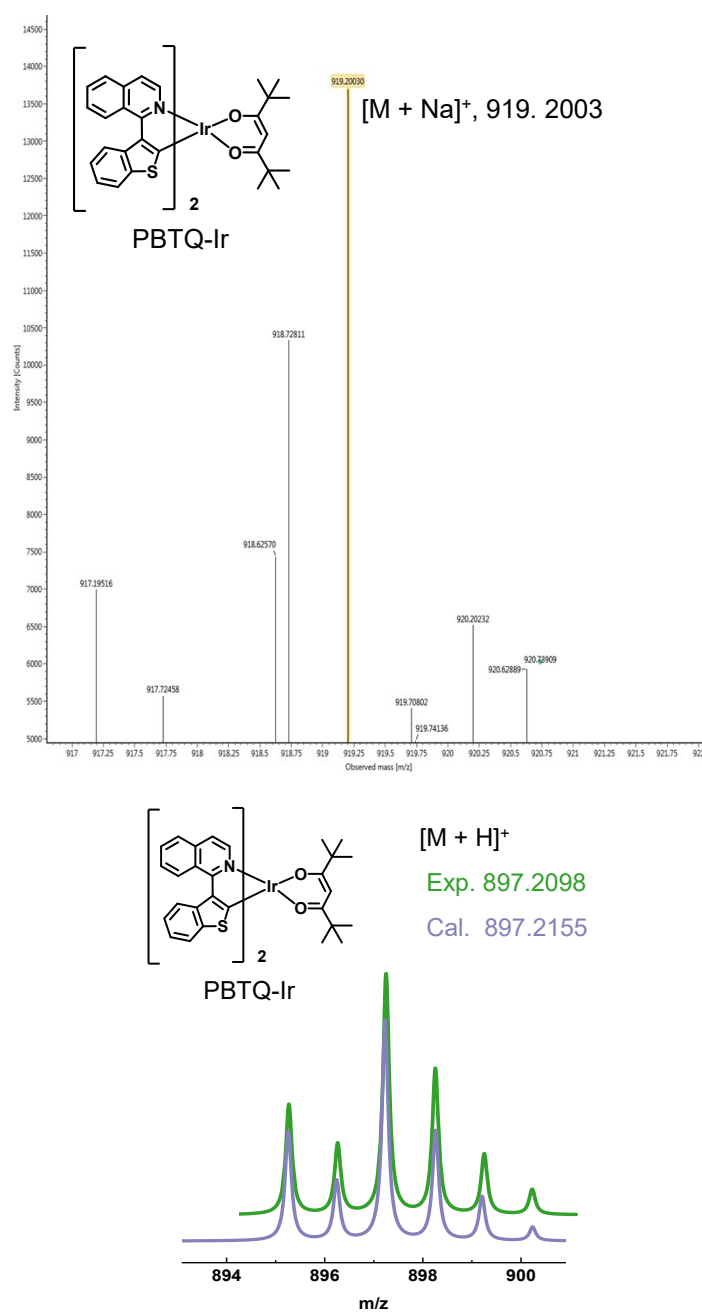

**Figure S1.** The  $^1\text{H}$ ,  $^{13}\text{C}$ , HRMS and the measured (green trace) and simulated (purple trace) isotopic patterns of **PBTQ-Ir**.

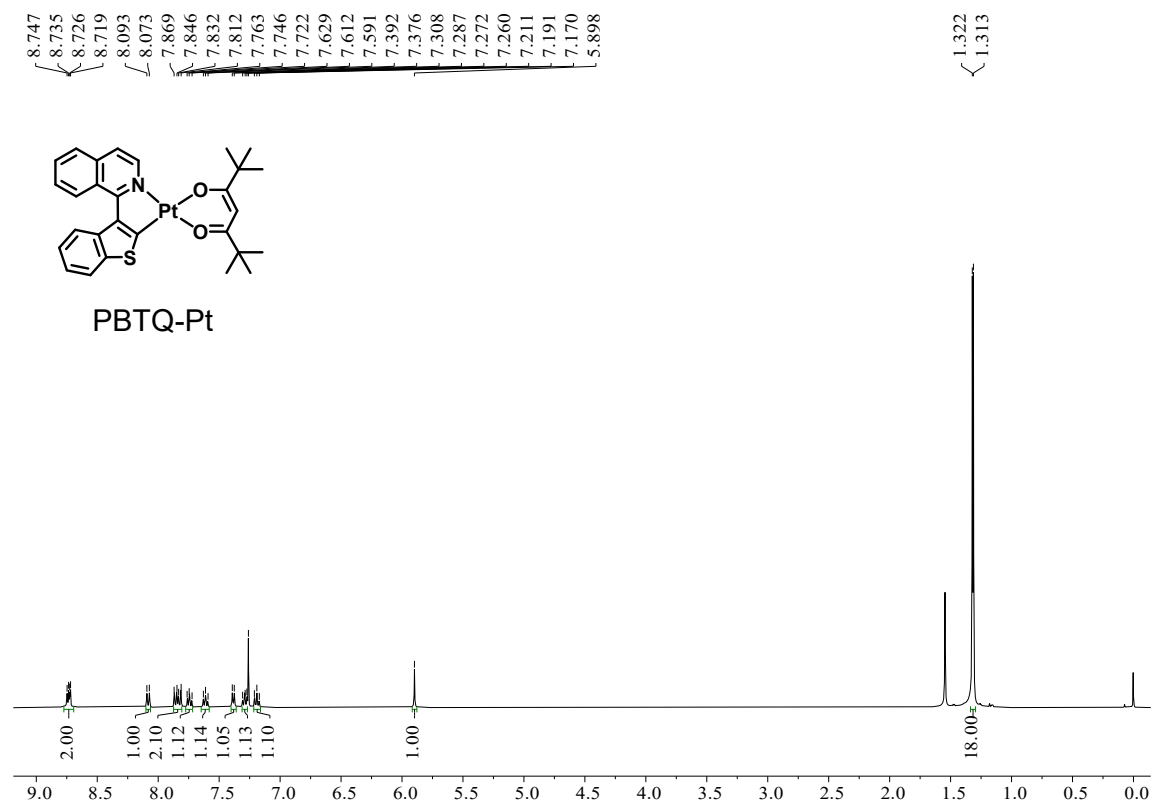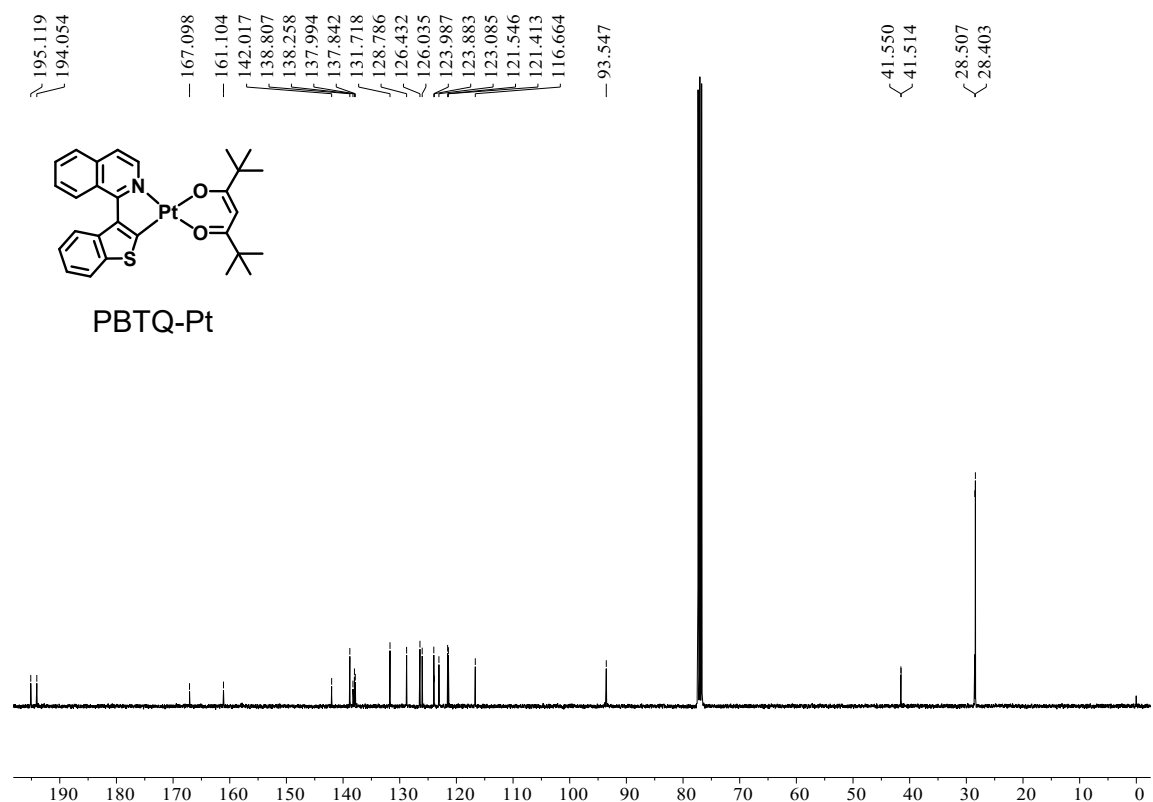

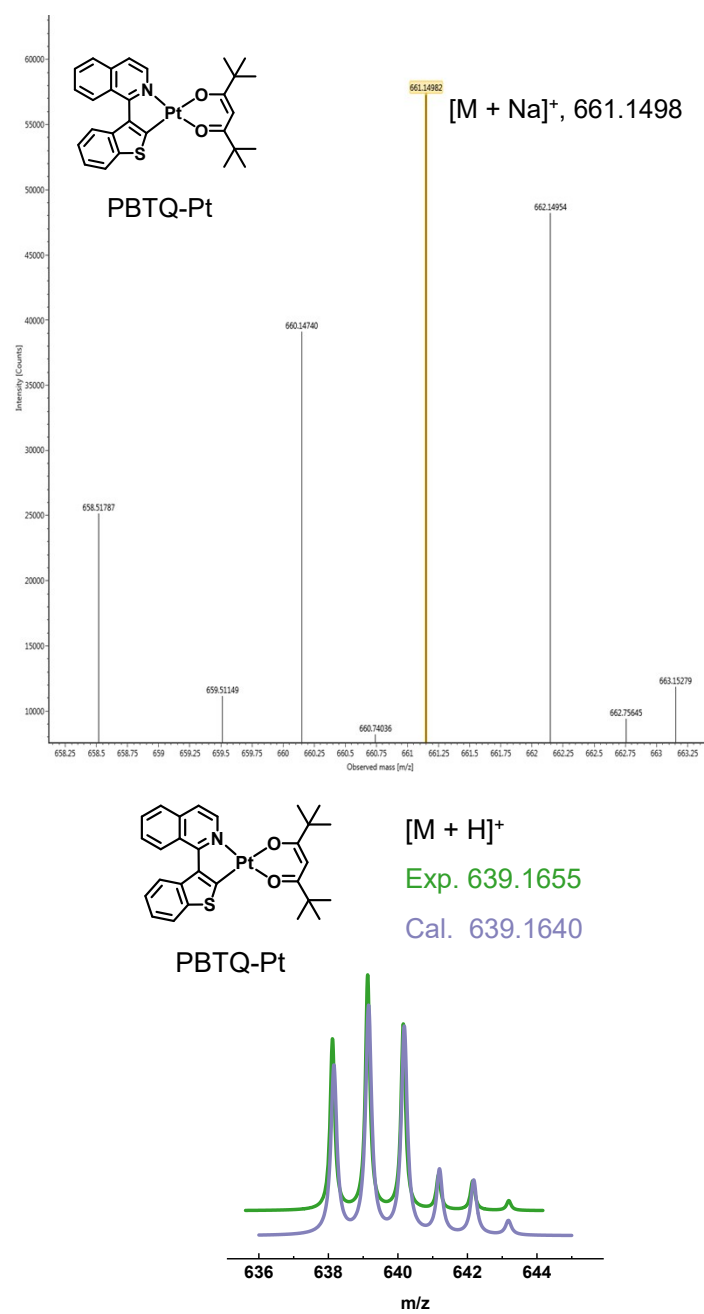

**Figure S2.** The  $^1\text{H}$ ,  $^{13}\text{C}$ , HRMS and the measured (green trace) and simulated (purple trace) isotopic patterns of **PBTQ-Pt**.

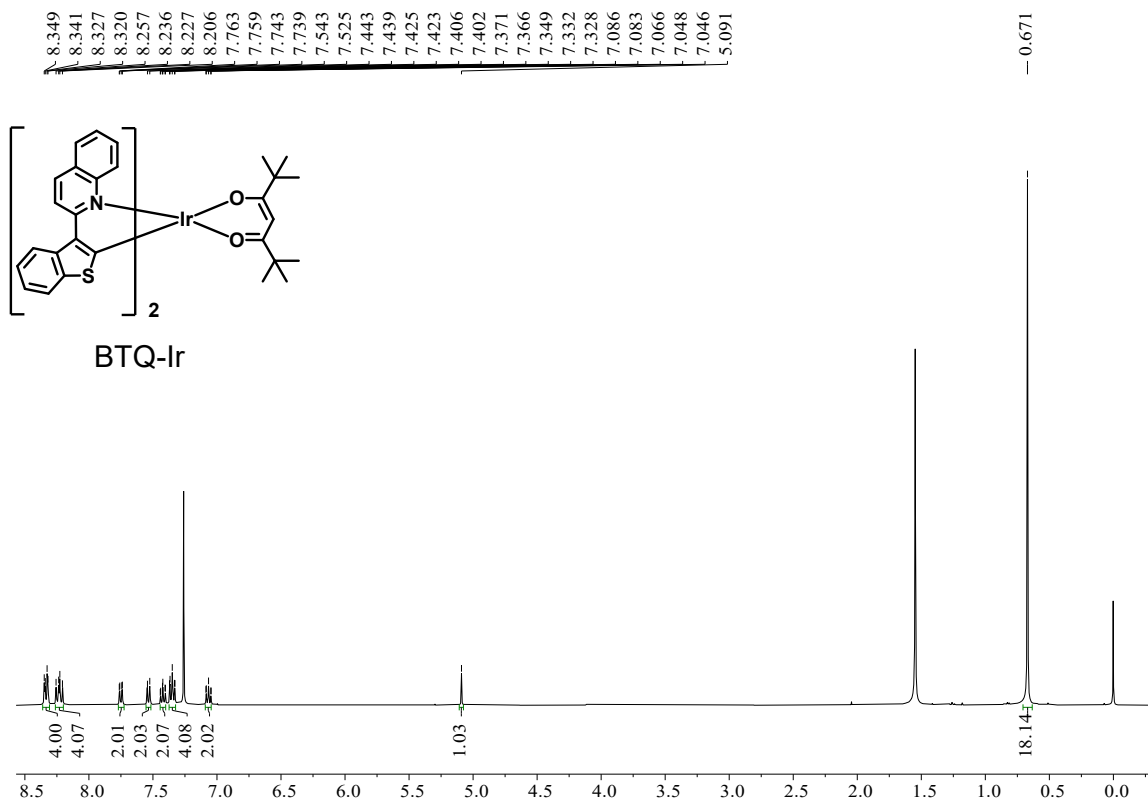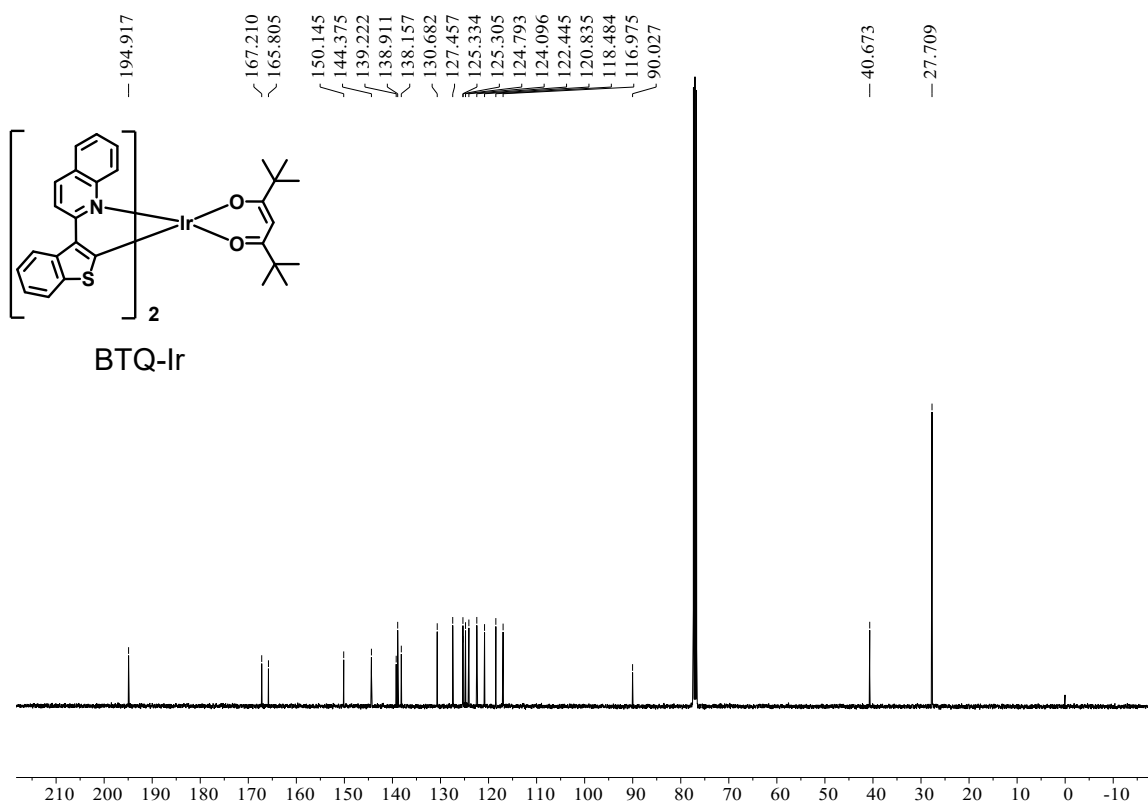



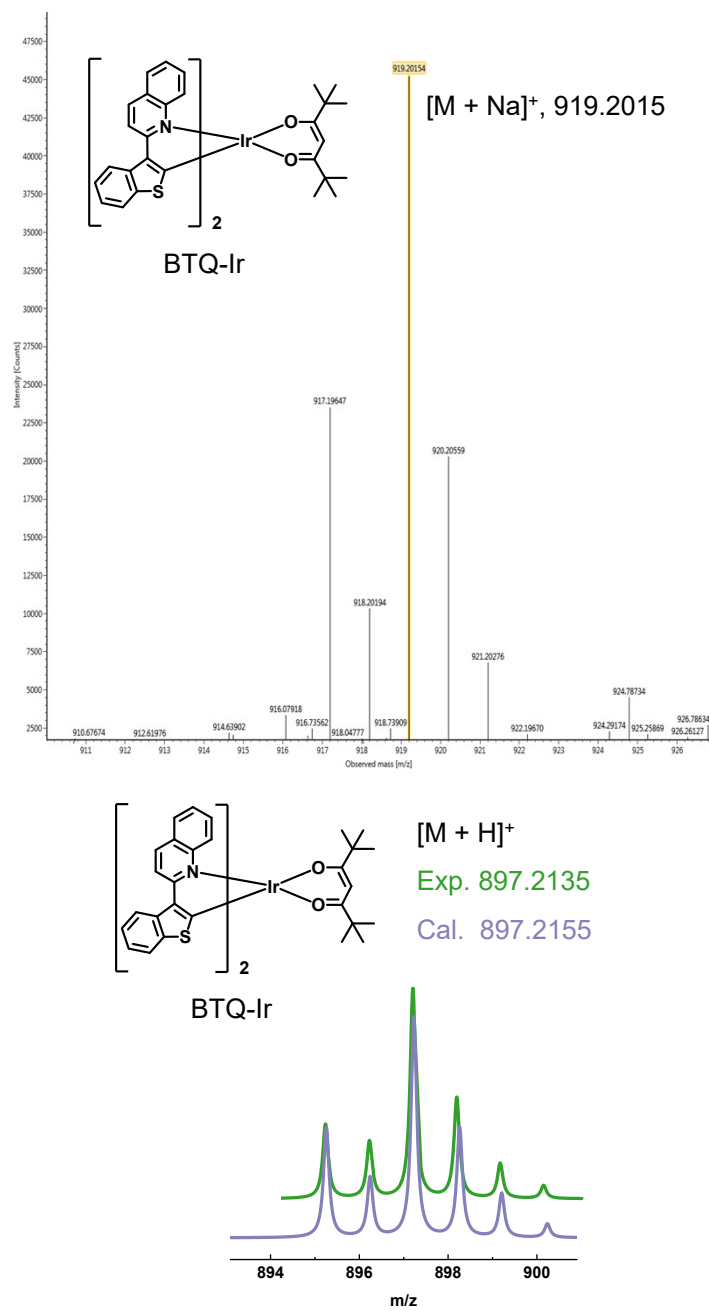

**Figure S3.** The  $^1\text{H}$ ,  $^{13}\text{C}$ , HRMS and the measured (green trace) and simulated (purple trace) isotopic patterns of **BTQ-Ir**.

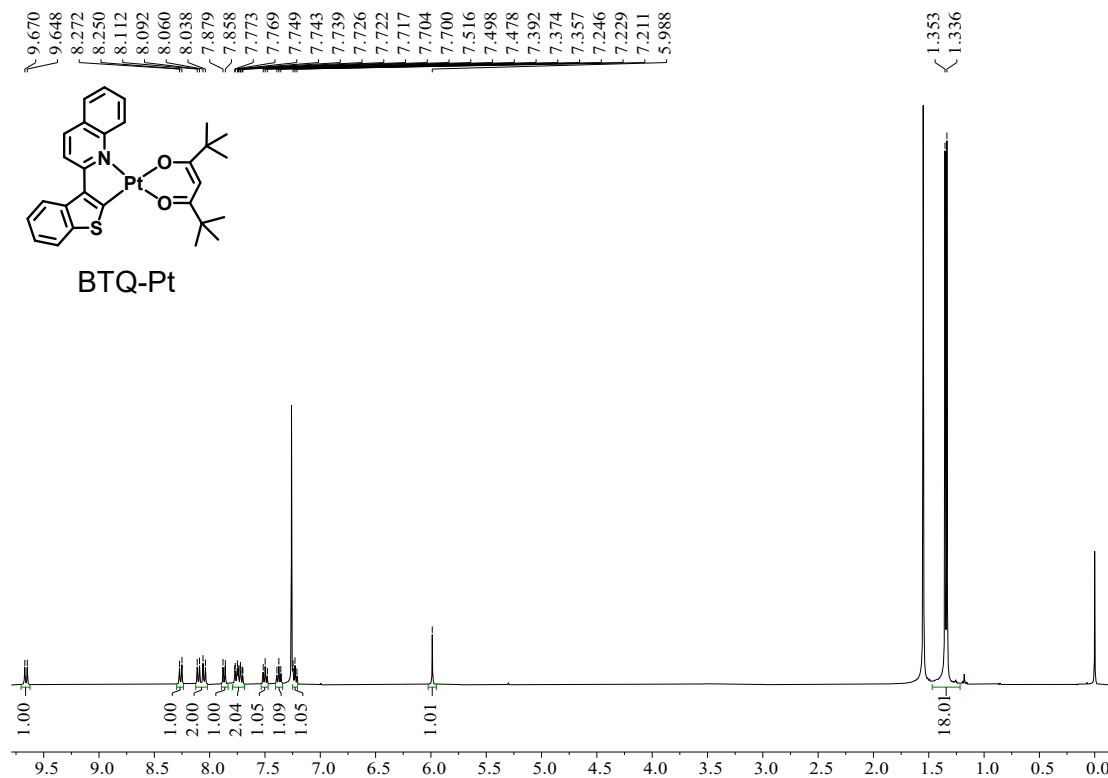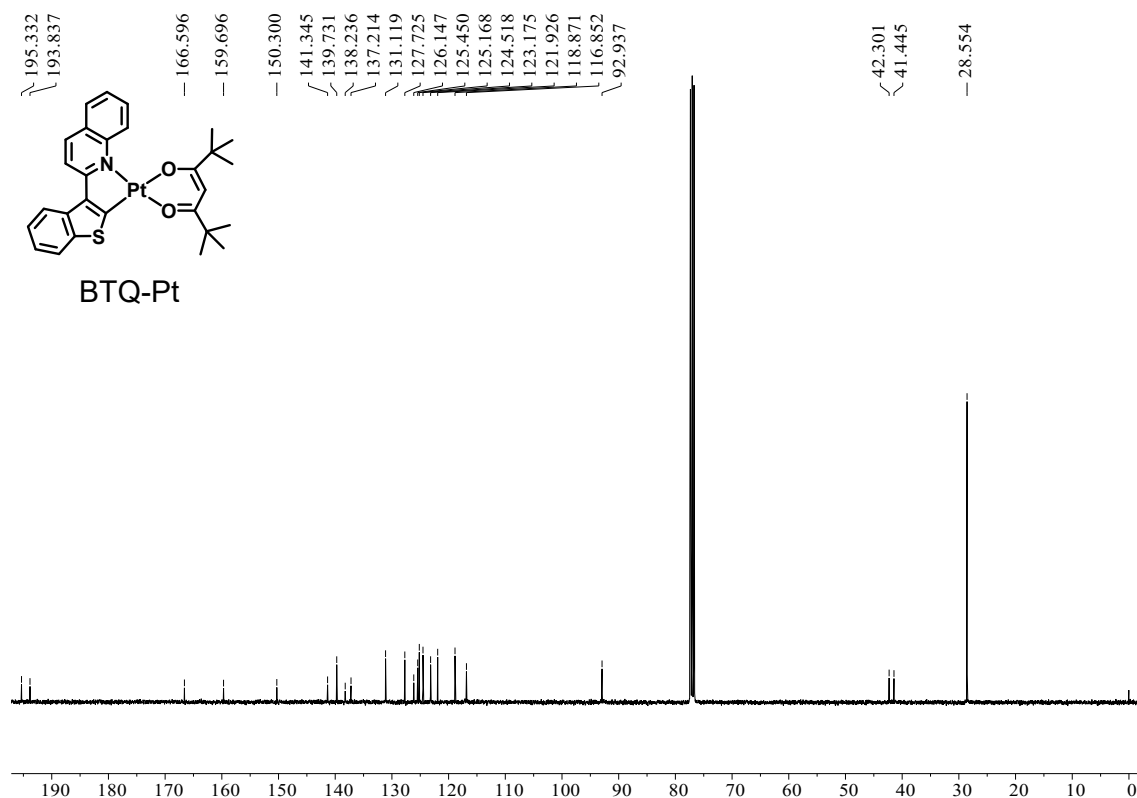

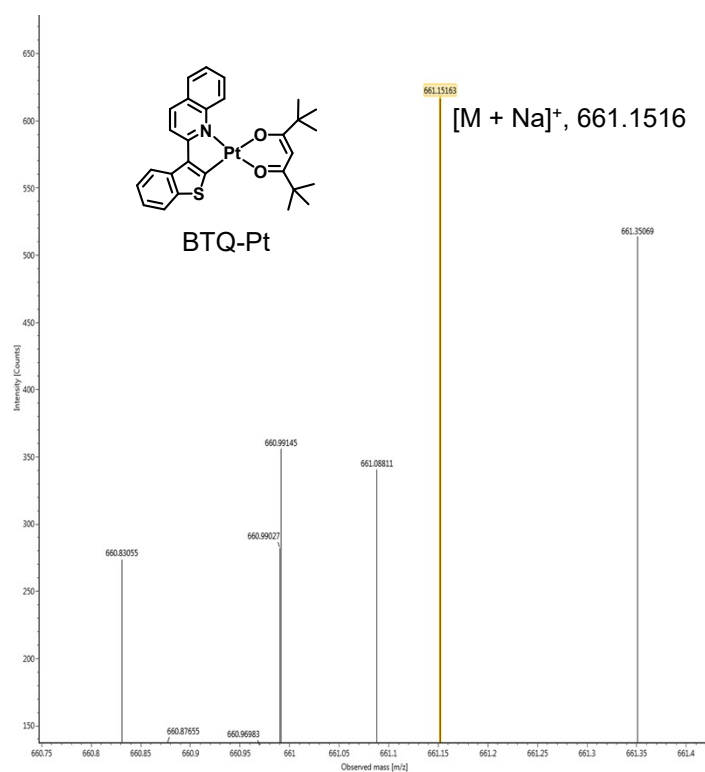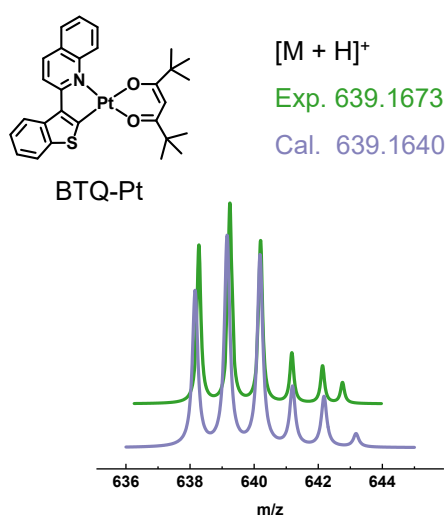

**Figure S4.** The  $^1\text{H}$ ,  $^{13}\text{C}$ , HRMS and the measured (green trace) and simulated (purple trace) isotopic patterns of **BTQ-Pt**.

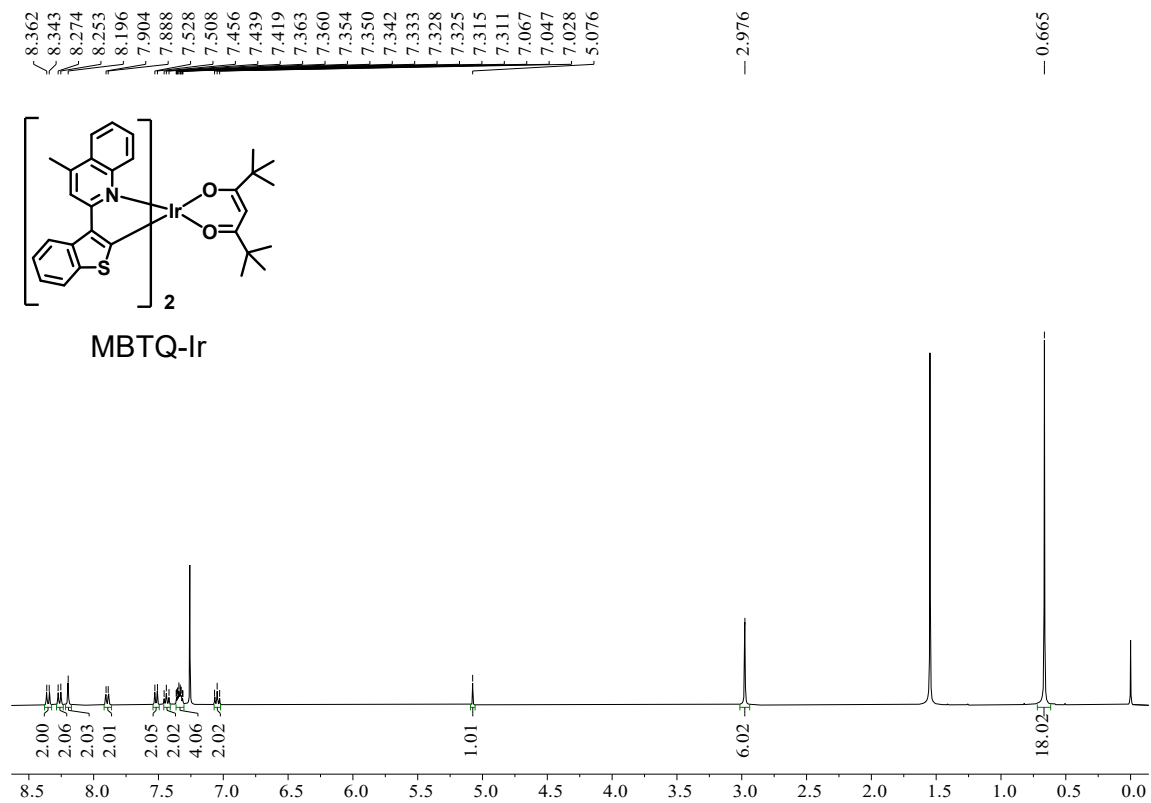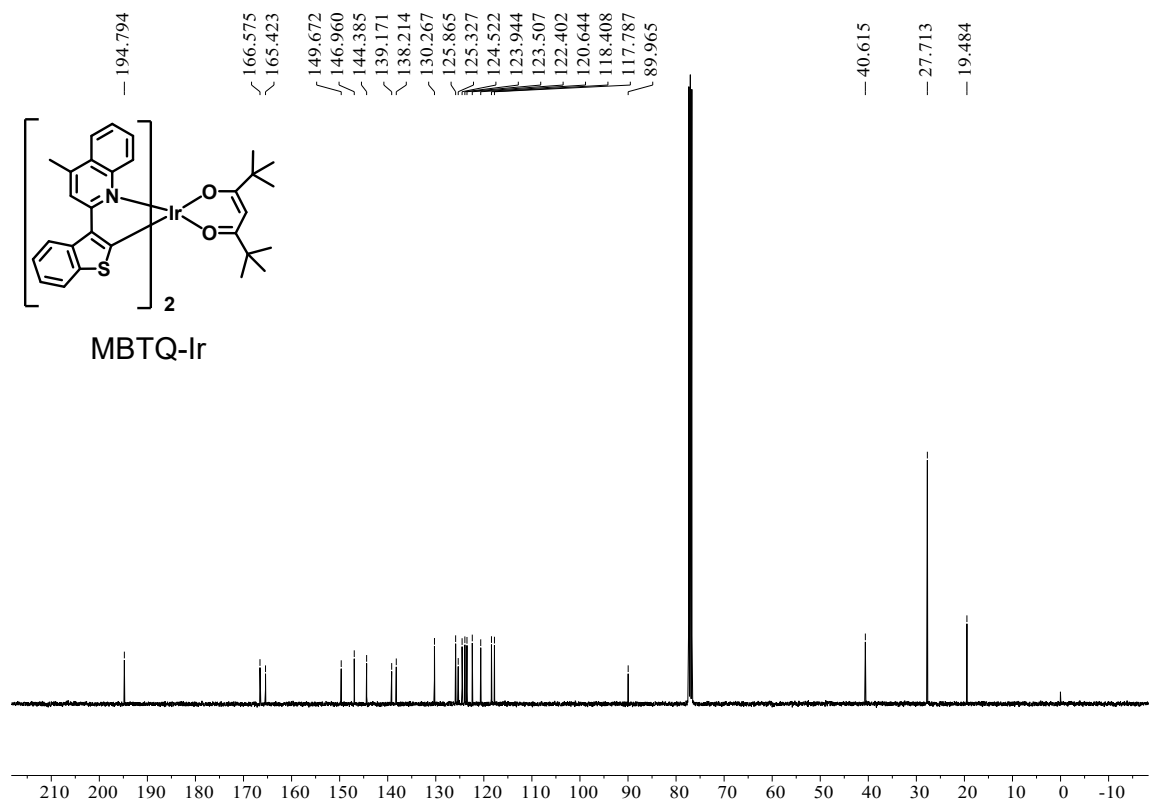

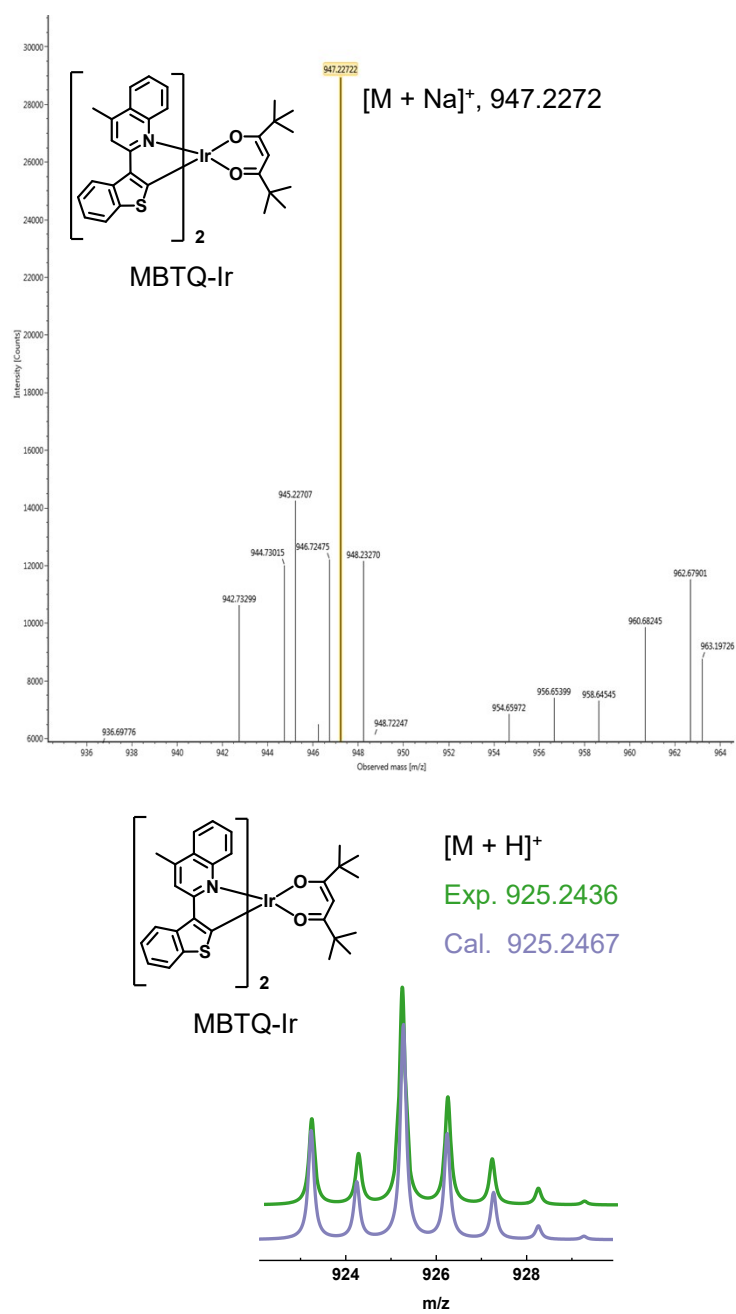

**Figure S5.** The  $^1\text{H}$ ,  $^{13}\text{C}$ , HRMS and the measured (green trace) and simulated (purple trace) isotopic patterns of **MBTQ-Ir**.

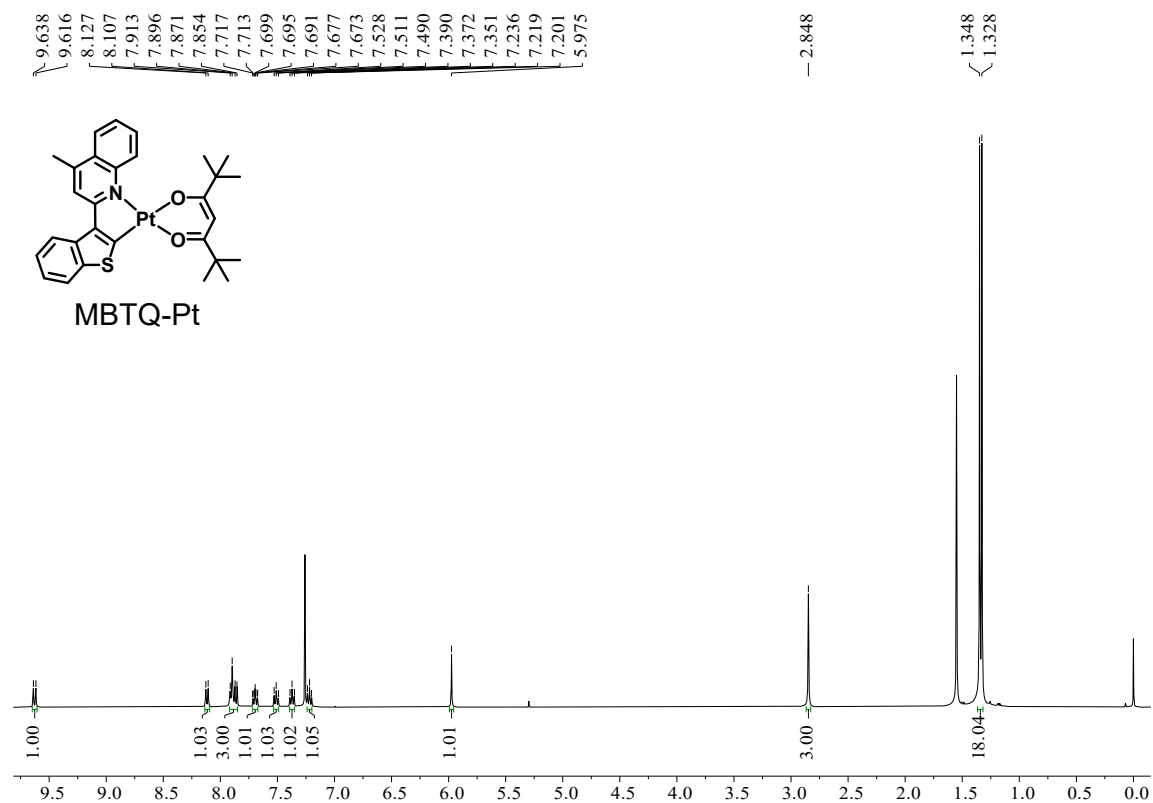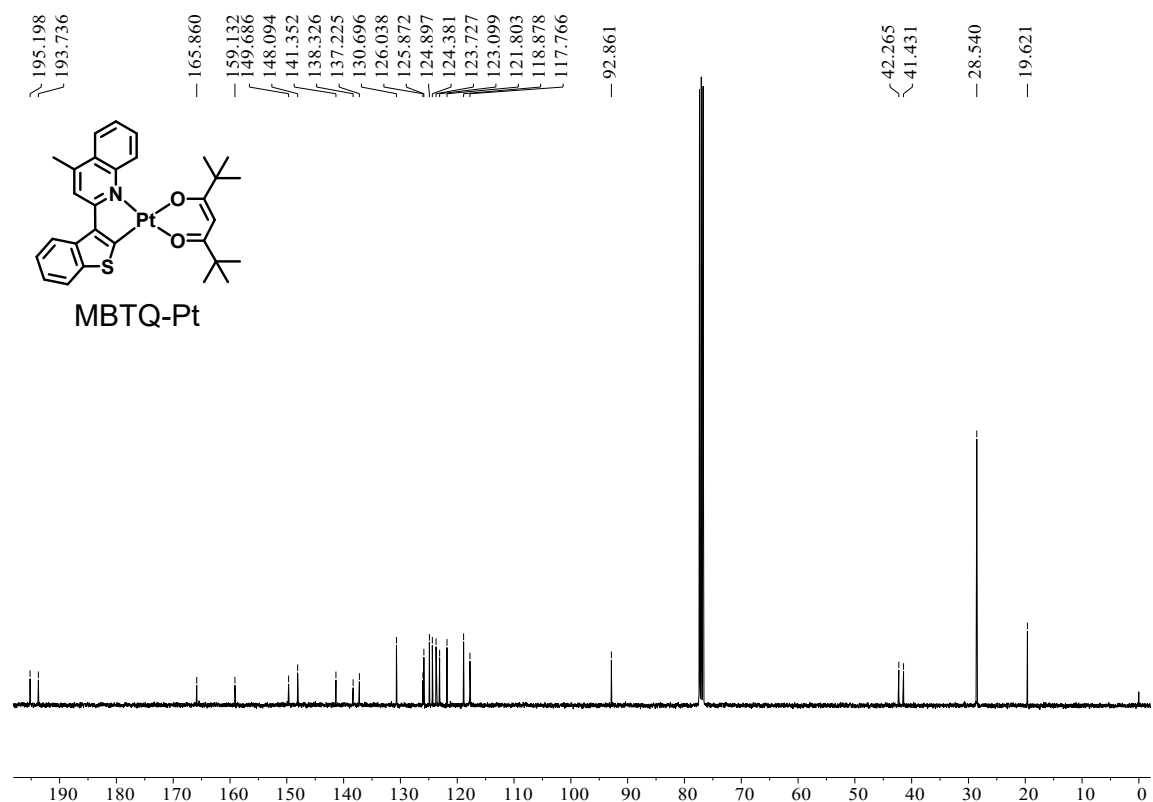

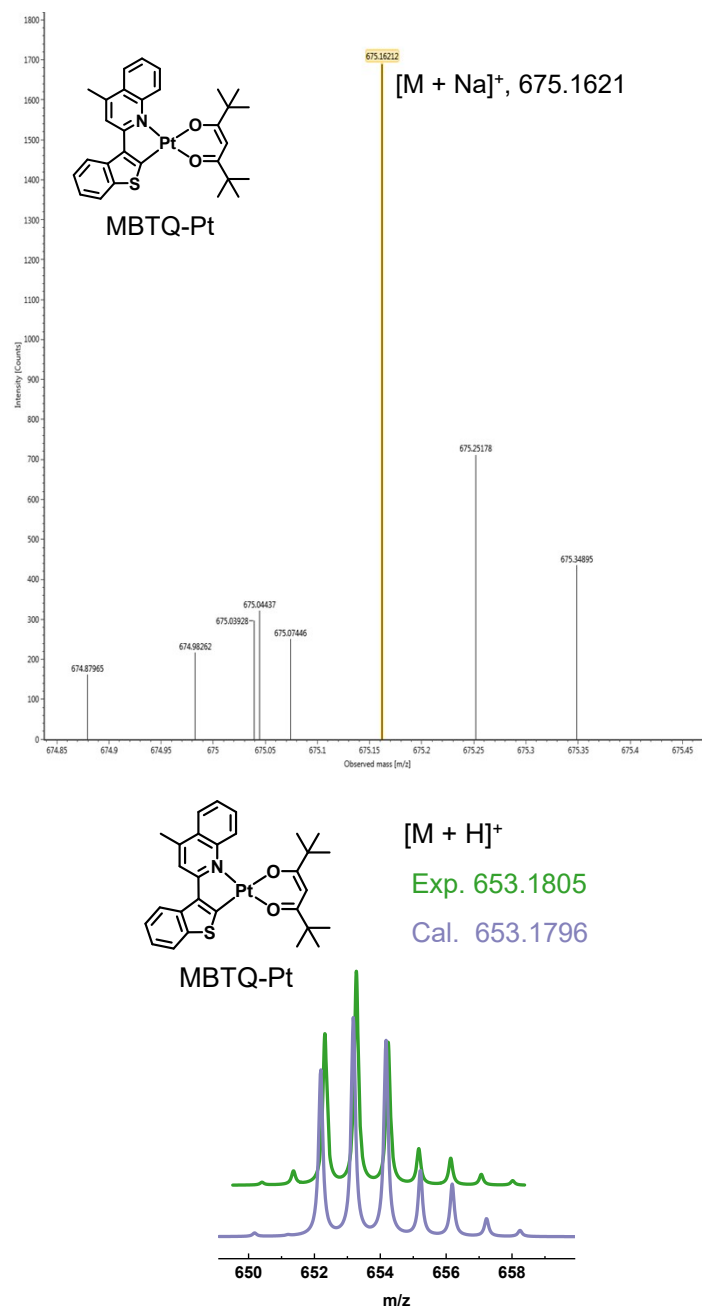

**Figure S6.** The <sup>1</sup>H, <sup>13</sup>C, HRMS and the measured (green trace) and simulated (purple trace) isotopic patterns of **MBTQ-Pt**.

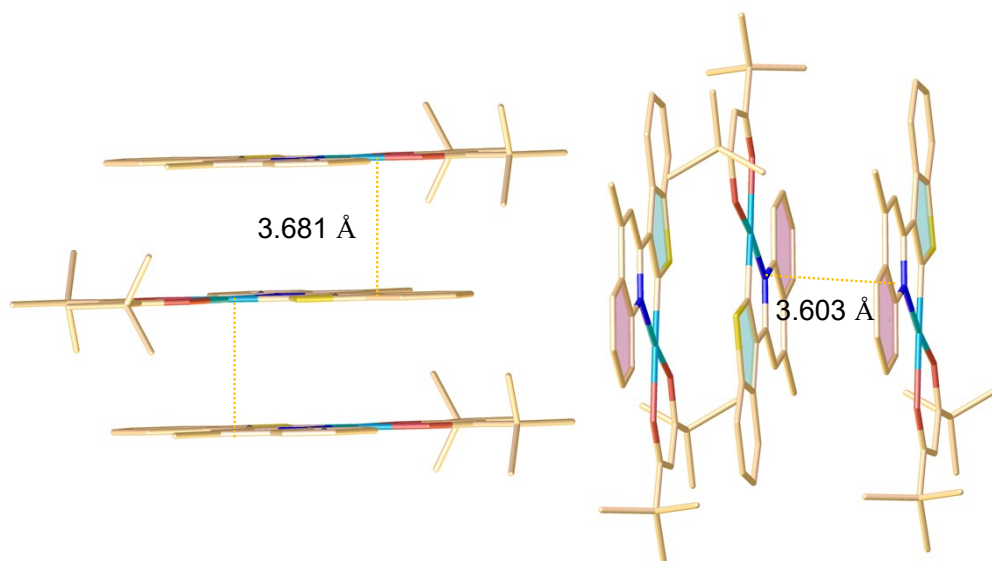

**Figure S7.** The  $\pi$ - $\pi$  stacking interactions of MBTQ-Pt in crystal. Hydrogen atoms are omitted for clarity.

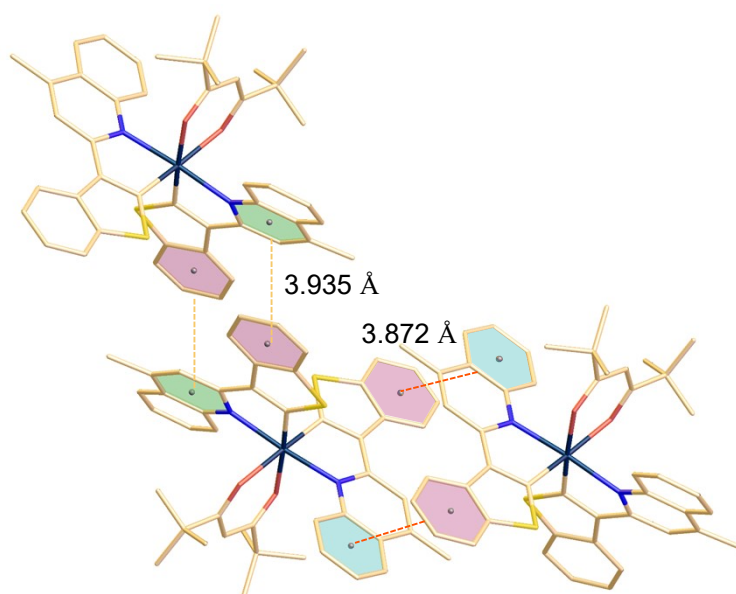

**Figure S8.** The  $\pi$ - $\pi$  stacking interactions of MBTQ-Ir in crystal. Hydrogen atoms are omitted for clarity.



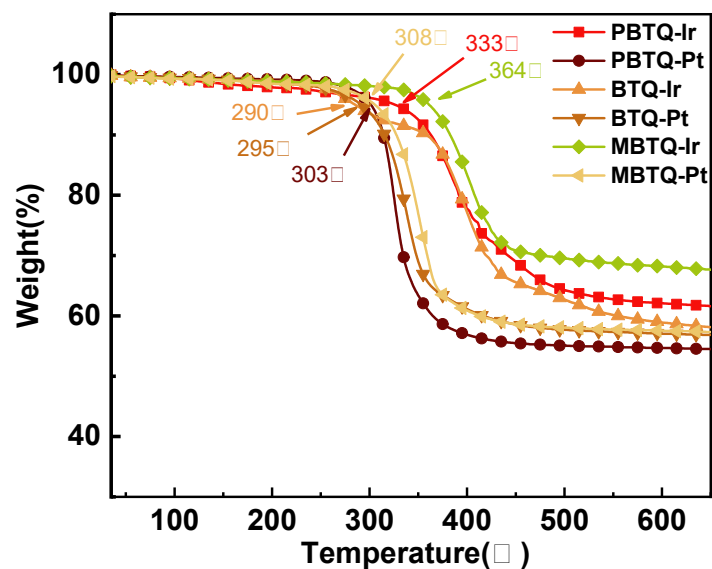

**Figure S9.** TGA curves of Pt(II) and Ir(III) complexes.

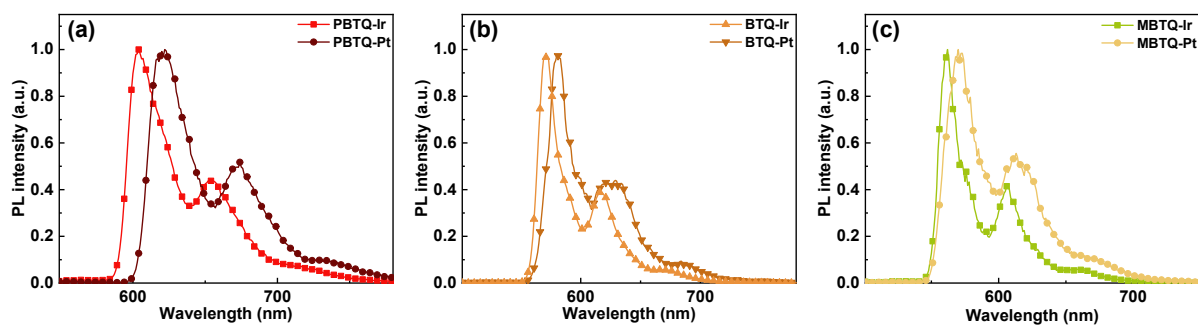

**Figure S10.** photoluminescence spectra of Ir(III) and Pt(II) complexes in the 2-MeTHF solution (a) (b) (c) at 77K.

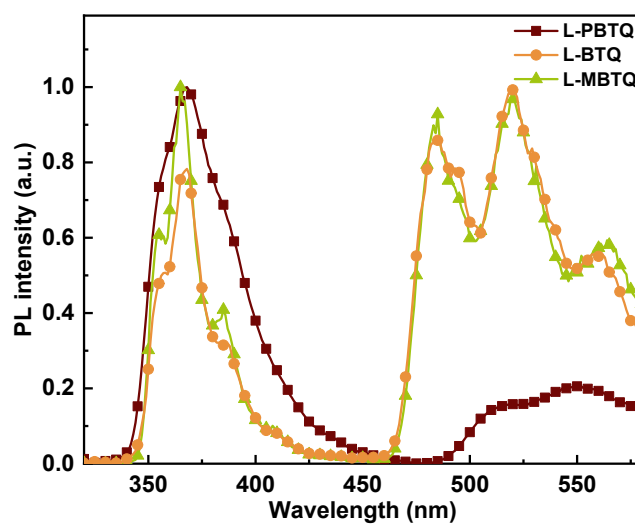

**Figure S11.** photoluminescence spectra of three ligands in the 2-MeTHF solution at 77K.

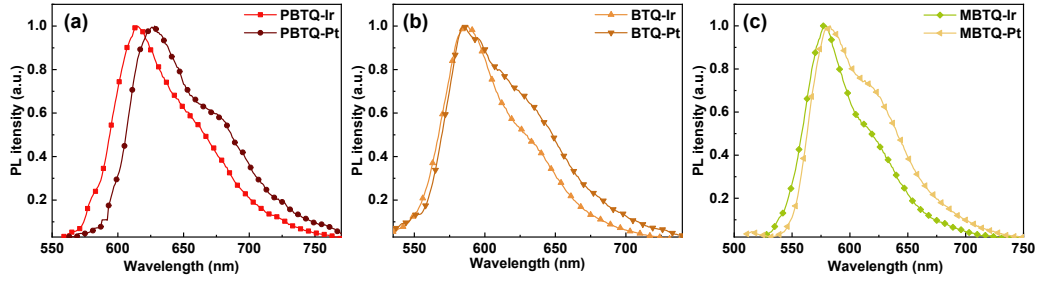

**Figure S12.** Photoluminescence spectra of Ir(III) and Pt(II) complexes in the doped PMMA films.

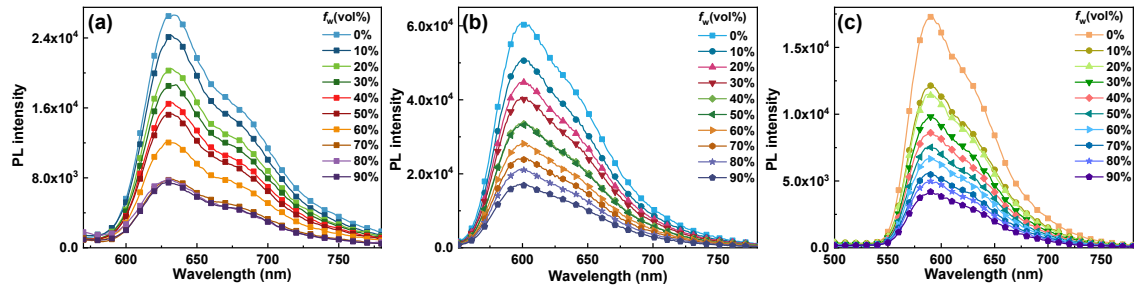

**Figure S13.** PL spectra of these Pt(II) complexes in DCM-MeOH mixture at different methanol fractions  $f_w$  under the same measurement conditions. (a) PBTQ-Pt, (b) BTQ-Pt, (c) MBTQ-Pt.

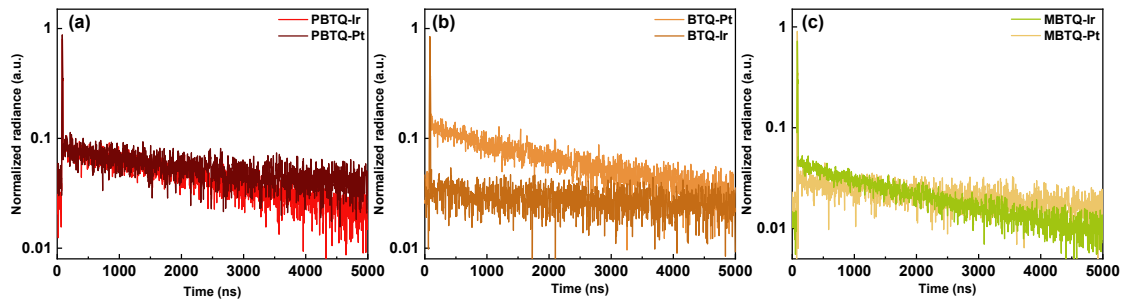

**Figure S14.** Transient decay in PMMA films (The doping concentrations of Pt(II) complexes and Ir(III) complexes are 2% and 4%, respectively.).

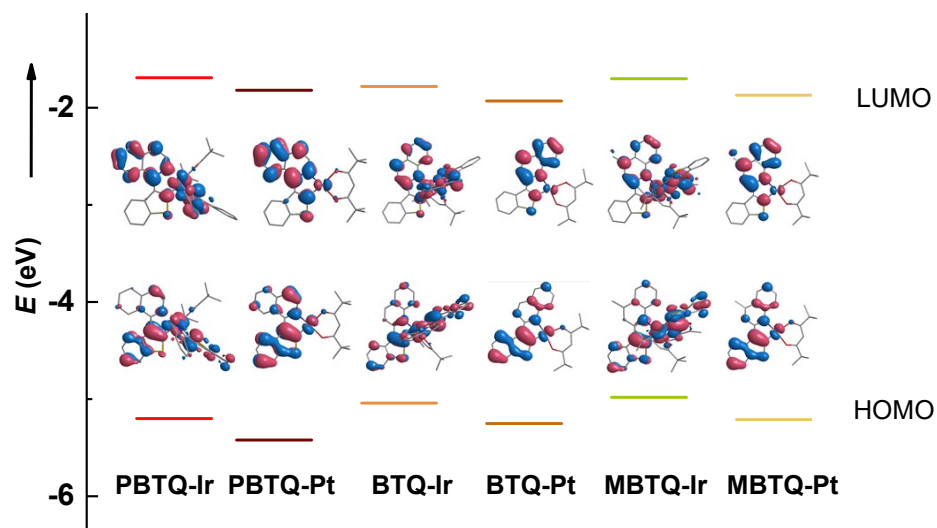

**Figure S15.** Molecular orbital (MO) distribution patterns of Ir(III) and Pt(II) complexes based on their optimized  $S_0$  geometries.

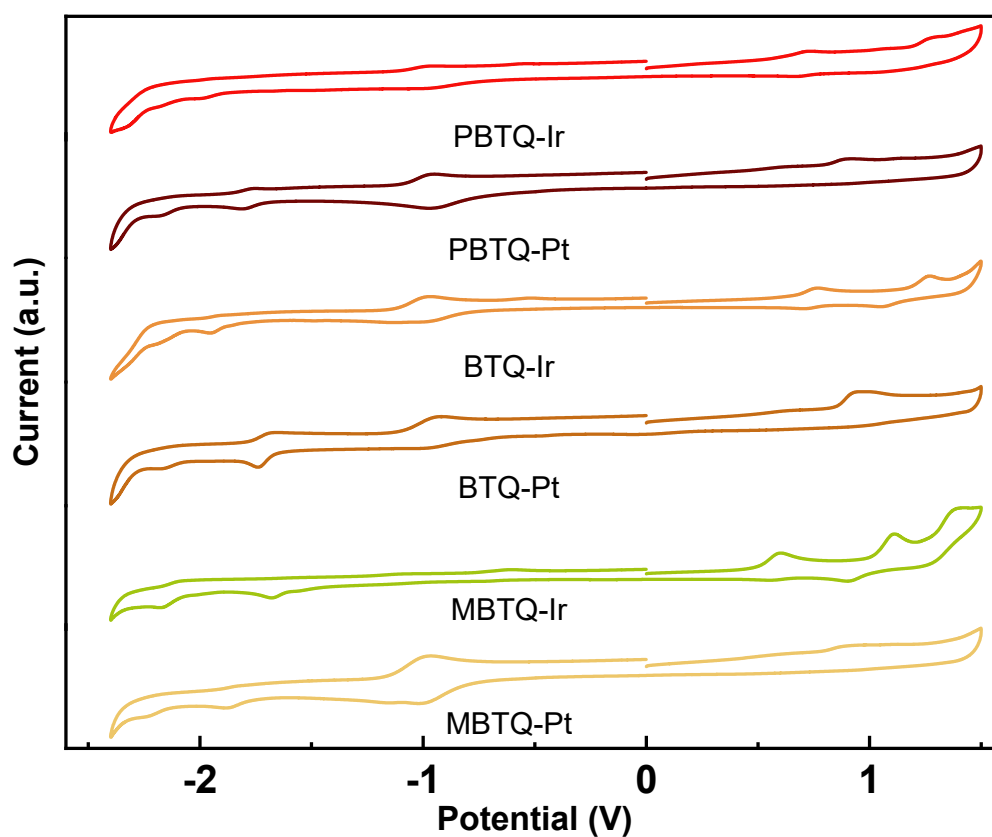

**Figure S16.** CV curves of these complexes.

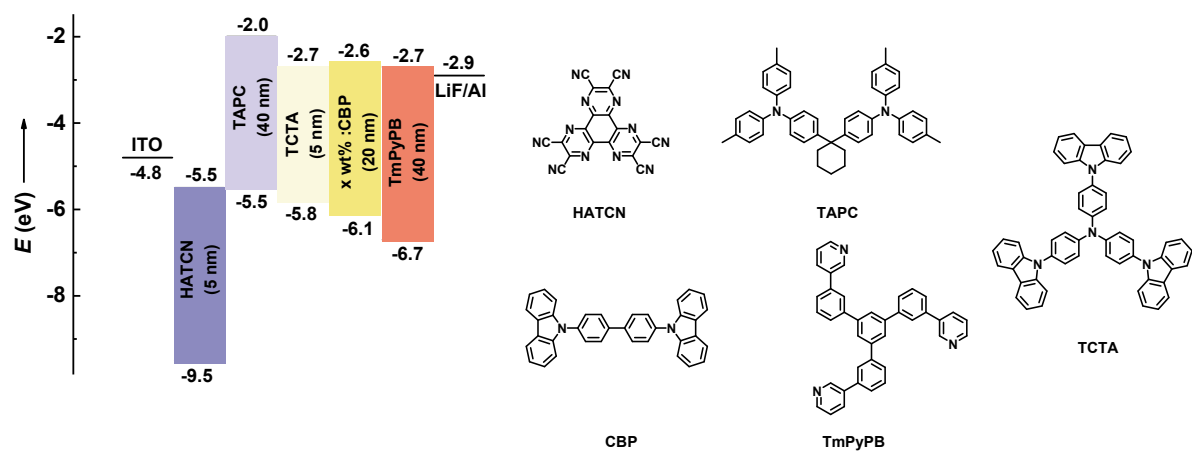

**Figure S17.** Energy levels and the chemical structures of materials used in OLEDs.

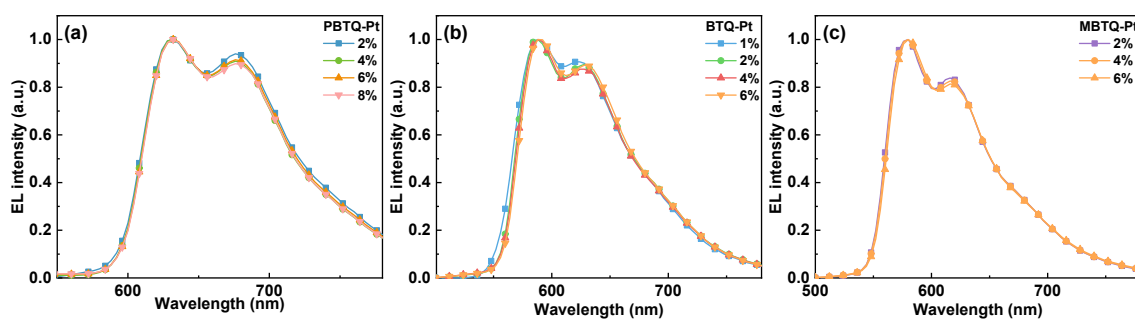

**Figure S18.** EL spectra at different CBP doping concentrations. (a) PBTQ-Pt, (b) BTQ-Pt, (c) MBTQ-Pt.

**Table S1.** Crystal data and structure refinement for **MBTQ-Ir**

| Crystal data and structure refinement |                                                                                |                                                  |                                                   |
|---------------------------------------|--------------------------------------------------------------------------------|--------------------------------------------------|---------------------------------------------------|
| formula                               | C <sub>47</sub> H <sub>43</sub> IrN <sub>2</sub> O <sub>2</sub> S <sub>2</sub> | $\rho_{\text{calc}}(\text{g cm}^{-3})$           | 1.532                                             |
| <i>M</i> (g mol <sup>-1</sup> )       | 924.24                                                                         | $\mu(\text{mm}^{-1})$                            | 3.264                                             |
| Crystal system                        | monoclinic                                                                     | F(000)                                           | 4091.0                                            |
| Space group                           | P2 <sub>1</sub> /c                                                             | 2 $\theta$ range for data collection/ $^{\circ}$ | 3.91 to 51.02                                     |
| <i>a</i> /Å                           | 19.5136(7)                                                                     | Reflections collected                            | 122150                                            |
| <i>b</i> /Å                           | 30.4253(11)                                                                    | Independent reflections                          | 16412                                             |
| <i>c</i> /Å                           | 15.9205(6)                                                                     | R ( <i>I</i> > 2 $\sigma$ ( <i>I</i> ))          | R <sub>1</sub> = 0.0496, wR <sub>2</sub> = 0.1084 |
| $\alpha/^{\circ}$                     | 90                                                                             | R (all data)                                     | R1 = 0.0589 wR <sub>2</sub> = 0.1131              |
| $\beta/^{\circ}$                      | 111.0370(10)                                                                   | Goodness-of-fit on F <sup>2</sup>                | 1.108                                             |
| $\gamma/^{\circ}$                     | 90                                                                             |                                                  |                                                   |
| Volume/Å <sup>3</sup>                 | 8822.1(6)                                                                      |                                                  |                                                   |
| <i>Z</i>                              | 8                                                                              |                                                  |                                                   |

**Table S2.** Selected bond lengths [Å] and angles [ $^{\circ}$ ] for **MBTQ-Ir**

| Bond angles ( $^{\circ}$ ) |            | Bond lengths (Å) |          |
|----------------------------|------------|------------------|----------|
| N1-Ir1-O2                  | 80.67(18)  | Ir1-N1           | 2.097(5) |
| N1-Ir1-O3                  | 101.2(2)   | Ir1-O2           | 2.123(4) |
| O3-Ir1-O2                  | 86.64(17)  | Ir1-O3           | 2.120(4) |
| N2-Ir1-N1                  | 176.1(2)   | Ir1-N2           | 2.093(5) |
| N2-Ir1-O2                  | 101.86(18) | Ir1-C11          | 1.961(7) |
| N2-Ir1-O3                  | 81.95(19)  | Ir1-C27          | 1.969(6) |
| C11-Ir1-N1                 | 78.4(2)    |                  |          |
| C11-Ir1-O2                 | 88.3(2)    |                  |          |
| C11-Ir1-O3                 | 174.9(2)   |                  |          |
| C11-Ir1-N2                 | 98.7(2)    |                  |          |
| C11-Ir1-C27                | 97.6(3)    |                  |          |
| C27-Ir1-N1                 | 99.2(2)    |                  |          |
| C27-Ir1-O2                 | 173.9(2)   |                  |          |
| C27-Ir1-O3                 | 87.4(2)    |                  |          |
| C27-Ir1-N2                 | 78.6(2)    |                  |          |

**Table S3.** Crystal data and structure refinement for **MBTQ-Pt**

| Crystal data and structure refinement |                                                     |                                         |                                                  |
|---------------------------------------|-----------------------------------------------------|-----------------------------------------|--------------------------------------------------|
| formula                               | C <sub>29</sub> H <sub>31</sub> NO <sub>2</sub> PtS | $\rho_{\text{calc}}(\text{g cm}^{-3})$  | 1.745                                            |
| <i>M</i> (g mol <sup>-1</sup> )       | 652.70                                              | $\mu(\text{mm}^{-1})$                   | 5.760                                            |
| Crystal system                        | monoclinic                                          | F(000)                                  | 644.0                                            |
| Space group                           | P2 <sub>1</sub> /m                                  | 2 $\theta$ range for data collection/°  | 5.454 to 55.042                                  |
| <i>a</i> /Å                           | 14.0035(6)                                          | Reflections collected                   | 43568                                            |
| <i>b</i> /Å                           | 6.9360(4)                                           | Independent reflections                 | 3072                                             |
| <i>c</i> /Å                           | 14.2412(10)                                         | R ( <i>I</i> > 2 $\sigma$ ( <i>I</i> )) | R <sub>1</sub> = 0.0151 wR <sub>2</sub> = 0.0369 |
| $\alpha$ /°                           | 90                                                  | R (all data)                            | R1 = 0.0152, wR <sub>2</sub> = 0.0370            |
| $\beta$ /°                            | 116.126(2)                                          | Goodness-of-fit on F <sup>2</sup>       | 1.121                                            |
| $\gamma$ /°                           | 90                                                  |                                         |                                                  |
| Volume/Å <sup>3</sup>                 | 1241.90(14)                                         |                                         |                                                  |
| <i>Z</i>                              | 2                                                   |                                         |                                                  |

**Table S4.** Selected bond lengths [Å] and angles [°] for **MBTQ-Pt**

| Bond angles (°) |           | Bond lengths (Å) |           |
|-----------------|-----------|------------------|-----------|
| O1-Pt1-O2       | 87.35(7)  | Pt1-N1           | 2.063(2)  |
| O1-Pt1-N1       | 168.56(8) | Pt1-C21          | 1.923(3)  |
| N1-Pt-O2        | 104.09(8) | Pt1-O2           | 2.088(18) |
| C21-Pt-O1       | 89.47(9)  | Pt1-O1           | 1.992(18) |
| C21-Pt-O2       | 176.81(8) |                  |           |
| C21-Pt-N1       | 79.10(9)  |                  |           |

**Table S5. Theoretical calculation results for complexes based on their optimized  $S_0$  geometries.**

| Complex        | MO        | Contribution percentages of      |       | Main configuration of                                    | Main configuration of                                    |
|----------------|-----------|----------------------------------|-------|----------------------------------------------------------|----------------------------------------------------------|
|                |           | metal $d_\pi$ orbitals and $\pi$ |       | $S_0 \rightarrow S_1$ excitation/ $\lambda_{\text{cal}}$ | $S_0 \rightarrow T_1$ excitation/ $\lambda_{\text{cal}}$ |
|                |           | orbitals of ligand to MOs        |       | (nm) <sup>a</sup>                                        | (nm) <sup>a</sup>                                        |
|                |           | (%)                              |       |                                                          |                                                          |
| <b>MBTQ-Ir</b> | Ir        | L-MBTQ                           | L-tmd | H $\rightarrow$ L (90.10%)                               | H $\rightarrow$ L (46.27%)                               |
|                | L+1 7.11  | 91.50                            | 1.39  | /456.67                                                  | /604.44                                                  |
|                | L 4.15    | 93.78                            | 2.07  |                                                          |                                                          |
|                | H 17.18   | 83.59                            | 2.23  |                                                          |                                                          |
|                | H-1 19.94 | 75.92                            | 4.14  |                                                          |                                                          |
| <b>MBTQ-Pt</b> | Pt        | L-MBTQ                           | L-tmd | H $\rightarrow$ L (96.10%)                               | H $\rightarrow$ L (84.69%)                               |
|                | L+1 1.11  | 42.71                            | 56.18 | /442.76                                                  | /612.97                                                  |
|                | L 7.36    | 90.94                            | 1.67  |                                                          |                                                          |
|                | H 16.99   | 80.60                            | 2.41  |                                                          |                                                          |
|                | H-1 23.41 | 34.57                            | 42.05 |                                                          |                                                          |
| <b>BTQ-Ir</b>  | Ir        | L-BTQ                            | L-tmd | H $\rightarrow$ L (97.59%)                               | H $\rightarrow$ L (70.67%)                               |
|                | L+1 3.70  | 95.54                            | 0.76  | /466.65                                                  | 573.02                                                   |
|                | L 5.01    | 92.96                            | 2.03  |                                                          |                                                          |
|                | H 19.74   | 78.76                            | 1.50  |                                                          |                                                          |
|                | H-1 15.43 | 83.22                            | 1.35  |                                                          |                                                          |
| <b>BTQ-Pt</b>  | Pt        | L-BTQ                            | L-tmd | H $\rightarrow$ L (96.63%)                               | H $\rightarrow$ L (88.47%)                               |
|                | L+1 1.76  | 10.40                            | 87.84 | 450.18                                                   | 575.93                                                   |

---

|                |     |        |       |              |              |        |
|----------------|-----|--------|-------|--------------|--------------|--------|
|                | L   | 6.54   | 92.34 | 1.12         |              |        |
|                | H   | 17.69  | 79.60 | 2.71         |              |        |
|                | H-1 | 23.33  | 33.19 | 43.48        |              |        |
| <b>MBTQ-Ir</b> | Ir  | L-MBTQ | L-tmd | H→L (97.69%) | H→L (71.31%) |        |
|                | L+1 | 3.54   | 95.92 | 0.54         | 463.43       | 568.42 |
|                | L   | 4.71   | 93.33 | 1.96         |              |        |
|                | H   | 20.09  | 78.47 | 1.44         |              |        |
|                | H-1 | 16.00  | 82.60 | 1.40         |              |        |
| <b>MBTQ-Pt</b> | Pt  | L-MBTQ | L-tmd | H→L (93.75%) | H→L (87.65%) |        |
|                | L+1 | 1.79   | 8.84  | 89.37        | 376.37       | 570.15 |
|                | L   | 6.18   | 92.74 | 1.08         |              |        |
|                | H   | 17.73  | 79.60 | 2.67         |              |        |
|                | H-1 | 24.41  | 32.29 | 43.30        |              |        |

---

<sup>a</sup> H and L stand for HOMO and LUMO, respectively. L-PBTQ, L- BTQ, L- MBTQ and L-tmd are corresponding

organic ligands.  $\lambda_{\text{cal}}$  denote calculated absorption wavelength



**Table S6. NTO results for complexes based on optimized T<sub>1</sub> geometries.**

| complex        | NTO      | Contribution percentages of metal $d_\pi$ orbitals and $\pi$ orbitals of ligand to |        |       |
|----------------|----------|------------------------------------------------------------------------------------|--------|-------|
|                | <i>a</i> | NTOs (%)                                                                           |        |       |
|                |          | Ir                                                                                 | L-PBTQ | L-tmd |
| <b>PBTQ-Ir</b> | P        | 5.90                                                                               | 85.21  | 8.89  |
|                | H        | 21.37                                                                              | 55.69  | 22.94 |
|                |          | Pt                                                                                 | L-PBTQ | L-tmd |
| <b>PBTQ-Pt</b> | P        | 8.25                                                                               | 90.27  | 1.48  |
|                | H        | 11.29                                                                              | 87.91  | 0.80  |
|                |          | Ir                                                                                 | L-BTQ  | L-tmd |
| <b>BTQ-Ir</b>  | P        | 6.07                                                                               | 91.58  | 2.35  |
|                | H        | 25.01                                                                              | 73.46  | 1.53  |
|                |          | Pt                                                                                 | L-BTQ  | L-tmd |
| <b>BTQ-Pt</b>  | P        | 8.86                                                                               | 89.52  | 1.62  |
|                | H        | 15.56                                                                              | 83.28  | 1.16  |
|                |          | Ir                                                                                 | L-BTQ  | L-tmd |
| <b>MBTQ-Ir</b> | P        | 5.75                                                                               | 91.97  | 2.28  |
|                | H        | 25.20                                                                              | 73.36  | 1.44  |
|                |          | Pt                                                                                 | L-BTQ  | L-tmd |
| <b>MBTQ-Pt</b> | P        | 8.49                                                                               | 89.96  | 1.55  |
|                | H        | 15.44                                                                              | 83.37  | 1.19  |

**Table S7. Summary of EL performance of Ir(III) complexes employing thiophene and benzothiophene OLEDs.**

|                 | $\lambda_{\text{EL}}$ (nm) | EQE (%) | Reference                                                   |
|-----------------|----------------------------|---------|-------------------------------------------------------------|
| Ir(III) complex | 576                        | 20.3    | This work                                                   |
| Ir(III) complex | 575                        | 17.9    | Dyes Pigments., <b>2019</b> , 162 863-871                   |
| Ir(III) complex | 654                        | 10.8    | Dyes Pigments., <b>2019</b> , 162 863-871                   |
| Ir(III) complex | 620                        | 10.4    | ACS Appl. Mater. Interfaces., <b>2019</b> , 11, 26152–26164 |
| Ir(III) complex | 627                        | 10.2    | Dyes Pigments., <b>2025</b> , 235 112620                    |
| Ir(III) complex | 623                        | 15.42   | Dyes Pigments., <b>2017</b> , 139, 779-787                  |
| Ir(III) complex | 610                        | 14.94   | Mol. Cryst. Liq. Cryst., <b>2017</b> , 659, 108-114         |
| Ir(III) complex | 577                        | 15.3    | Dyes Pigments., <b>2025</b> 235, 112620                     |
| Ir(III) complex | 627                        | 10.2    | Dyes Pigments., <b>2025</b> , 235, 112620                   |
| Ir(III) complex | 556                        | 18.2    | Dalton Trans., <b>2020</b> , 49, 13797–13804                |
| Ir(III) complex | 562                        | 10.9    | Dalton Trans., <b>2020</b> , 49, 13797–13804                |
| Ir(III) complex | 628                        | 8.2     | Org. Electron., <b>2015</b> , 21, 1–8                       |
| Ir(III) complex | 588                        | 11.2    | Org. Electron., <b>2013</b> , 14, 3392–3398                 |

## REFERENCES

- [1] G.M. Sheldrick, *Acta. Crystallogr. C Struct. Chem.* 71 (2015) 3-8.
- [2] O.V. Dolomanov, L.J. Bourhis, R.J. Gildea, et al., *J. Appl. Crystallogr.* 42 (2009) 339-341.
- [3] G.M. Sheldrick, *Acta. Crystallogr. A Found. Adv.* 71 (2015) 3-8.
- [4] W.R. Wadt, P.J. Hay, *J. Chem. Phys.* 82 (1985) 284-298.
- [5] P.J. Hay, W.R. Wadt, *J. Chem. Phys.* 82 (1985) 299-310.
- [6] M.J. Frisch, G.W. Trucks, H.B. Schlegel, et al., *Gaussian 16 Rev. B.01*, Wallingford, CT, 2016.
